# Supplementary material for: Discovery of 2.45 Ga trondhjemitic gneiss in Eastern Hebei, North China Craton: A constraint on Precambrian crustal evolution
Source: Copernicus journal article supplement (doi:10.5194/egusphere-2025-5595), 2026-01-23
Supplement: Supplementary file 1 [file Supplementary Table S1.xlsx]

## Sheet: Sheet1
Supplementary Table S1. Compilation of zircon ages for Archean magmatic rocks in the eastern Hebei, North China Craton.
Data source	Area	Sample No.	Rock type	Latitud	Logitud	Magmatic zircon age (Ma)	Metamorphic zircon age (Ma)	Xenocrystic zircon age (Ma)
Huang et al., 1986	Qian'an		Amphibolite			Sm-Nd isochron age 3470 ± 107
Jahn et al., 1987	Qian'an		Amphibolites			Sm-Nd isochron age 3500 ± 80
Geng et al., 2006	Qingyangshu	QX03	Gabbroic gneiss			2536 ± 1
	Qiuhuayu	ZH10	Trondhjemite gneiss			2515 ± 2	2469 ± 33, 2415 ± 260
	Xiaoguanzhuang	QX05	Tonalitic gneiss			2495 ± 8	2418 ± 61
	Longwan	TP19	Gabbroic gneiss			2515 ± 21
	Yuhuzhai	TP22	Tonalitic gneiss			2550 ± 21	2439 ± 5
	Cuizhangzi	CZ02	Tonalitic gneiss			2492 ± 5	2425 ± 9
	Yinmahe	LL07	Granodioritic gneiss			2551 ± 6
Geng et al., 2018	Toudaaocun	JD03-7	Amphibole plagioclase gneiss	N40°18'46.7″	E118°06'09.3″	2492 ± 11	2464 ± 39
	Honghuolu	JD04-1	Amphibole plagioclase gneiss	N40°16'36.7″	E118°05'43.6″	2529 ± 30	2487 ± 18
	Honghuolu	JD04-2	Amphibole plagioclase gneiss	N40°16'36.7″	E118°05'43.6″	2527 ± 8	2473 ± 16
	Hanerzhuang	JD21-1	Amphibole two-pyroxene plagioclase gneiss	N40°19'59.5″	E118°11'53.7″	2533 ± 6	2482 ± 22
	Taipingzhai	JD09-1	Charnockite	N40°13'56.1″	E118°31'33.3″	2511 ± 10	2479 ± 26
	Saheqiao	JD17-5	Garnet amphibole plagioclase pyroxenite	N40°19'47.9″	E118°16'11″	2536 ± 15	2486 ± 17
	Shuichang	JD40-1	Granulite	N40°08'55.1″	E118°35'24.2″	2510 ± 10
Yang et al., 2008	Jiekouling	FW04-28	Diorite			2528 ± 3	2499 ± 6, 2501 ± 8
	Qinhuangdao	FW04-42	Granodiorite			2522 ± 5	2497 ± 4	2641 ± 7, 2630 ± 10
	Qinhuangdao	FW04-51	Granodiorite			2523 ± 6	2451 ± 6, 2441 ± 6	2647–2643
	Anziling	FW04-84	Granitic gneiss			2524 ± 8	2490 ± 4
	Anziling	FW04-85	Biotite–plagioclase gneiss			2522 ± 4	2499 ± 5	2565–2541
Li et al., 2010	Huangbaiyu	04QA09	Olivine gabbro	N39°55′55″	E118°33′16″	2516 ± 26
		04QA08	Syenite			2504 ± 11
Nutman et al., 2011	Caozhuang	J06/04	Tonalitic gneiss	N39°55′45"	E118°33′40.8"	3228 ± 110
		J08/02	Tonalitic gneiss	N39°55′46.2"	E118°33′53.4"	3287 ± 11
		J08/04	Tonalitic gneiss	N39°55′42"	E118°33′48"	≥3129
		J06/02	Granitic gneiss	N39°55′48.6"	E118°33′33"	2936 ± 34
		J06/10	Granulite gneiss	N40°04′28.2"	E118°34′27.6"	2548 ± 7	2506 ± 6
		J91/11	Tonalitic gneiss			2548 ± 13
		J00/33	Leptynite			2534 ± 8
		J00/31	Monzonite			2491 ± 13
	Beidaihe	J08/12	Monzogranite	N39°48′40.2"	E119°29′4.8"	2512 ± 12
		J08/15	Tonalite	N39°48′47.4"	E119°29′30.6"	2546 ± 6
		J08/16	Monzogranite	N39°48′47.4"	E119°29′30.6"	2525 ± 10
	Qinhuangdao	J08/18	Mafic granitoid	N39°59′1.8"	E119°37′42.6"	2531 ± 3
	Santunying western region	J08/05	Granulite gneiss	N40°24′14.4"	E118°23′510"	2525 ± 20
		J08/09	Granulite pegmatite	N40°19′48"	E118°16′10.8"	2499 ± 9
		J08/10	Granulite gneiss	N40°19′48"	E118°16′10.8"	2537 ± 9	2498 ± 6
Lv et al., 2012	Wangzhangzi.	XHG06	Meta-basic volcanic rocks			2543 ± 9	2503 ± 13
	Xihangou	WZZ06	Meta-felsic volcanic rocks			2511 ± 12
Guo et al., 2013	Saheqiao	11JD02-3	Amphibole pyroxene plagioclase gneiss	N40°22′34″	E118°12′34″	2614 ± 18	2461 ± 51	2705 ± 46
		11JD06-3	Garnet two-pyroxene granulite	N40°19′40″	E118°09′21″	2525 ± 7	2428 ± 41
		11JD07-4	Garnet pyroxene plagioclase amphibolite	N40°19′42″	E118°11′25″	2515 ± 5	2470 ± 15, 2236 ± 57, 2391±15
		11JD12-1	Biotite two-pyroxene granulite	N40°19′45″	E118°16′19″	2519 ± 16	2372 ± 47	2639 ± 56
		11JD17-2	Biotite garnet pyroxene plagioclase gneiss	N40°15′42″	E118°08′36″	2609 ± 26	2546 ± 25
Guo et al., 2014	Zhuzhangzi	1JD39-1	Biotite amphibole plagioclase gneiss	N40°21'21″	E119°03'25″	2514 ± 16	2154 ± 31, 2306 ± 65
	Baichengzi	11JD42-2	Two-mica felsic gneiss	N40°17'35″	E119°06'12″	2522 ± 8	2457 ± 88
Guo et al., 2015	Badaohe	12JD130-2	Pyroxene plagioclase amphibolite	N40°21′57″	E118°47′32″	2527 ± 15	2450 ± 27
	Cuizhangzi	12JD36-2	Pyroxene plagioclase amphibolite	N40°22′10″	E118°39′44″	2558 ± 15	2462 ± 25
	Badaohe	12JD130-3	Pyroxene plagioclase amphibolite	N40°21′48″	E118°47′30″	2511 ± 12	2445 ± 15, 2296 ± 46
	Qinglong	12JD37-5	Garnet biotite plagioclase gneiss	N40°25′59″	E118°59′15″	2598 ± 8	2464 ± 58
	Qinglong	12JD38-1	Biotite plagioclase gneiss	N40°26′21″	E118°57′37″	2520 ± 13	2461 ± 21	2775 ± 21, 2594 ± 27
	Zhuzhangzi	11JD42-2	Two-mica schist	N40°17′35″	E119°06′12″	2534 ± 25	2457 ± 88
	Zhuzhangzi	11JD39-1	Biotite amphibole plagioclase gneiss	N40°21′21″	E119°03′25″	2514 ± 16	2306 ± 65, 2154 ± 31	2904 ± 30, 2802 ± 29, 2613 ± 31
Guo et al., 2017	Shangying	11JD67-1	Garnet pyroxene plagioclase amphibolite	N40°20′37″	E118°23′36″	2554 ± 23	2466–2243	2654 ± 36
		11JD66-2	Plagioclase amphibolite	N40°21′05″	E118°22′54″	2603 ± 31	2529–2462	2670 ± 24
		12JD23-1	Plagioclase amphibolite	N40°24′09″	E118°24′32″	2511 ± 8	2455–2314
		12JD25-6	Chloritized plagioclase amphibolite	N40°24′14″	E118°24′56″	2506 ± 7	2466–2267
Bai et al., 2014	Saheqiao	11JD04-1	Dioritic gneiss	N40°20′52″	E118°13′07″	2518 ± 10	2454–2307	2570 ± 18
	Saheqiao	11JD06-1	Dioritic gneiss	N40°19′40″	E118°09′21″	2513 ± 8	2446 ± 11
	Shangying	12JD30-1	Dioritic gneiss	N40°20′54″	E118°23′22″	2523 ± 6	2440 ± 15, 2353 ± 48
	Taipingzhai	11JD53-1	Trondhjemitic gneiss	N40°15′43″	E118°30′48″	2531 ± 9	2441 ± 11	2612 ± 11
	Gualanyu	12JD01-4	Trondhjemitic gneiss	N40°21′30″	E117°47′51″	2517 ± 11	2450 ± 20	2608 ± 23
	Houjiazhai	11JD79-2	Trondhjemiticgneis	N40°16′37″	E118°05′43″	2535 ± 23	2472–2448	2618 ± 52, 2601 ± 56
Bai et al., 2015	Yuhuzhai	11JD72–1	Dioritic gneiss	N40°13′21″	E118°19′21″	2523 ± 12	2443–2274	2621 ± 16
	Cuizhangzi	11JD25–1	Tonalitic gneiss	N40°21′48″	E118°39′17″	2530 ± 17	2471 ± 47	2615 ± 28
	Gezi'an	11JD50–5	Tonalitic gneiss	N40°12′43″	E118°30′05″	2524 ± 8	2446–1750	2620 ± 20
	Taipingzhai	11JD47–2	Granodiorite	N40°11′25″	E118°33′10″	2515 ± 22	2455 ± 18, 2393–2259	2644 ± 34
	Yuhuzhai	11JD54–1	Tonalite	N40°17′25″	E118°27′33″	2517 ± 31	2470–2330	2847 ± 56, 2641 ± 44
	Gezi'an	11JD57–2	Tonalite	N40°13′21″	E118°28′26″	2527 ± 28
Bai et al., 2016	Cuizhangzi	11JD29-1	Dioritic gneiss	N40°24′46″	E118°39′42″	2517 ± 10	2448–2447	2577 ± 24
	Qinglong	13QL29-1	Dioritic gneiss	N40°25′38″	E118°51′22″	2509 ± 14	2452 ± 6, 2340 ± 22
	Cuizhangzi	11JD28-2	Tonalitic gneiss	N40°23′12″	E118°39′37″	2505 ± 23		2568 ± 53
	Dushan pluton	13JD10-1	Granodioritic gneiss	N40°36′21″	E118°48′28″	2516 ± 10	2449 ± 11
Bai et al., 2019	Santunying	J1628	Tonalitic gneiss	N40°14′01.4″	E118°14′19.4″	2525 ± 7	2512 ± 11, 2479–2470
	Hanerzhuang	J1634	Tonalitic gneiss	N40°23′22.8″	E118°10′16.0″	2537 ± 17		2578
	Santunying	J15123	Anatectic tonalitic gneiss	N40°13′11.7″	E118°09′04.7″	2537 ± 25	2496 ± 26
	Hongshankou	J15143	Anatectic tonalitic gneiss	N40°19′36.2″	E118°04′04.1″	2527 ± 11	2515 ± 19
	Hongshankou	J1620	Tonalitic gneiss	N40°19′23.6″	E118°07′38.9″	2532 ± 13	2496 ± 26, 1843
	Sandaohe	J1615	Trondhjemitic gneiss	N40°21′26.1″	E118°02′43.5″	2519 ± 14
	Qiuhuayu	J15130	Trondhjemitic gneiss	N40°15′36.9″	E118°07′24.2″	2546 ± 26	2494 ± 13, 1811 ± 24
	Hongshankou	J1618	Dioritic gneiss	N40°20′41.8″	E118°03′14.0″	2544 ± 12	2500
	Qiuhuayu	J15132	Dioritic gneiss	N40°16′34.9″	E118°03′14.1″	2537 ± 10	2514
	Sandaohe	J1612	Dioritic gneiss	N40°16′34.10″	E118°03′32.2″	2534 ± 6	2497 ± 11, 2434 ± 8
	Xiaoguanzhuang	J15144	Tonalitic gneiss	N40°23′17.3″	E118°10′44.1″	2531 ± 9	2508 ± 8
	Xiaoguanzhuang	J1616	Hornblendite	N40°20′41.8″	E118°03′14.0″	2530 ± 7	2496 ± 23
	Toudaocheng	J15138	Meta-gabbro	N40°17′14.7″	E118°05′34.2″	2531 ± 8	2512
	Gaojiadian	J1513	Meta-gabbro	N40°16′06.9″	E118°12′42.9″	2513 ± 10	2503 ± 9, 1796 ± 14 Ma
	Shimen	J1517	Pegmatite	N40°18′46.0″	E118°10′29.1″		2489 ± 10, 1772 ± 30
Duan et al., 2015	Madayu	JD1314	Metabasic dyke				1822 ± 7
	Saheqiao	JD1350	Metabasic dyke			2510 ± 5 Ma	2340 ± 41, 1814 ± 10
Duan et al., 2019	Saheqiao	JD1462	Metabasic dyke	N40°19′46.2″	E118°12′37.8″		1820 ± 5
	Badaohe	JD15158	Metabasic dyke	N40°20′58.2″	E118°45′44.4″		1820 ± 14
Duan et al., 2022	Saheqiao	J1309	Syenogranitic Pegmatite	N40°20′28″	E118°12′50″	2488 ± 5
	Taipingzhai	J1320	Tonalitic gneiss	N40°14′1″	E118°30′18″	2510 ± 13	2508 ± 10
	Saheqiao	J1349	Dioritic gneiss	N40°19′4″	E118°16′59″	2547 ± 7	2501 ± 9, 1912 ± 9
	Santunying	J1353	Granodioritic gneiss	N40°17′15″	E118°18′5″	2503 ± 12	2468 ± 33
Fu et al., 2016	Houjiazhai	11JD85-1	Quartz dioritic gneiss	N40°17′52″	E117°57′36″	2522 ± 13	2463 ± 13	2623 ± 28
	Gualanyu	11JD99-1	Quartz dioritic gneiss	N40°12′51″	E117°35′05″	2533 ± 14	2456 ± 28	2603 ± 32
	Shangying	11JD66-1	Trondhjemitic gneiss	N40°21′05″	E118°22′54″	2532 ± 14	2377 ± 47	2713 ± 12, 2635 ± 11
	Houjiazhai	12JD115-2	Trondhjemitic gneiss	N40°17′50″	E118°02′22″	2499 ± 4	2451 ± 7, 2275 ± 22, 1957 ± 108
Fu et al., 2017	Qinhuangdao	15JD38-1	Monzogranitic gneiss	N40°11′09″	E119°43′36″	2527 ± 6	2495 ± 9
Fu et al., 2019	Caozhuang	16JD01-1	Trondhjemitic gneiss	N39°55′49″	E118°33′33″	2901 ± 17		3223 ± 7
	Caozhuang	15JD66-1	Quartz monzodioritic gneiss	N40°17′45″	E119°18′06″	2543 ± 4		2603 ± 17, 2576 ± 17
	Jielingkou	15JD33-1	Granodioritic gneiss	N40°06′37″	E119°12′13″	2542 ± 4	2502 ± 15
	Mutoudeng	16JD17-1	Granodioritic gneiss	N40°24′35″	E119°23′33″	2530 ± 4
	Anziling	16JD23-1	Granodioritic gneiss	N40°31′38″	E119°46′46″	2543 ± 5	2498 ± 19
	Qinhuangdao	15JD01-1	Granodioritic gneiss	N39°54′42″	E119°21′55″	2541 ± 9
	Caozhuang	15JD25-1	Granodioritic gneiss	N40°06′58″	E119°53′25″	2526 ± 3	2502–2433
Fu et al., 2021	Shuangwang	15JD48-7	Biotite amphibolite	N39°50′54″	E119°04′31″	2549 ± 4	2519 ± 22
	Qian'an	15JD64-1	Biotite two-pyroxene plagioclase gneiss	N40°04′33″	E118°48′15″	2558 ± 7	2501–2405	2635 ± 18
	Shuangwang	16JD11-2	Hornblende plagioclase gneiss	N39°54′17″	E119°05′34″	2536 ± 6	2499–2419
	Lulong	15JD67-1	Biotite plagioclase gneiss	N39°51′59″	E118°51′31″	2555 ± 5	2533–1723
	Lulong	16JD08-3	Biotite plagioclase gneiss	N39°50′10″	E118°51′48″	2542 ± 5	2510–2322
	Shuangwang	15JD48-2	Biotite plagioclase gneiss	N39°50′54″	E119°04′31″	2554 ± 4		2586 ± 14, 2584 ± 14
	Mutoudeng	17JD16-2	Hornblende plagiocalse gneiss	N40°20′54.40″	E119°15′06.08″	2522 ± 14
Sun et al., 2016	Huangbaiyu	J1111	Gneissic monzogranite			3107 ± 20
		J1109	Meta-gabbro				2498 ± 9
		J1110	Meta-gabbro				2498 ± 9
		J1113	Amphibole plagioclase gneiss				2481 ± 13
		HY1104	Gneissic monzogranite				2515 ± 6
	Yangyashan	J1116	Biotite plagioclase gneiss,				2515 ± 6
		HY1103	Gneissic K-rich granite			2354
		HY1101	Gneissic k-feldspar granite				2497 ± 6
Yao et al., 2017	Zunhua	JD15-79	Garnet–two-pyroxene granulite			2498 ± 6	2461 ± 5
	Jingchangyyu	JD15-140	Mylonite			2501 ± 24	2475 ± 13	2518 ± 13
	Jingchangyyu	JD15-136	Mylonite			2474 ± 30	2474 ± 30	2573–2531
	Qiuhuayu	JD15-84	Granitic gneiss			2527 ± 58	2467 ± 17
	Xiaoguanzhuang	JD15-102				2514 ± 3
	Santunying	D15-61				2517 ± 23
Cui et al., 2018	Huangbaiyu	14CZ01-10	Hornblendite			Sm-Nd isochron age 3580 ± 98
		14CZ02-12-1	Hornblendite
		15CZ06-1	Amphibolite
		15CZ07-1	Amphibolite
		13CZ03-3	Amphibolite
		13CZ03-4	Amphibolite
		14CZ01-3	Hornblendite			Sm-Nd isochron age 3179 ± 90
		15CZ04-9	Amphibolite
		14CZ03-6	Amphibolite
		14CZ35-2	Amphibolite
		14CZ01-9-1	Amphibolite
		14CZ01-9-2	Amphibolite
		14CZ03-3	Amphibolite
		15CZ05-13	Amphibolite
Liou et al., 2019	Caochang	LP103	Felsic gneiss			2907 ± 3	2875 ± 3, 2498 ± 5
		LP100	Felsic gneiss			2915 ± 4	2497 ± 11
		LP101	Amphibolite				2508 ± 3
		LP131	Felsic gneiss			2919 ± 18	2885 ± 26, 2504 ± 21
		LP181	Felsic gneiss			2904 ± 25	2483 ± 29
						Sm-Nd isochron age 3107 ± 240
Liou and Guo, 2019	Caochang	LP169	Dioritic gneiss	N40° 14′56.64"	E117° 44′44.52"	2906 ± 14
		LP177	Tonalitic gneiss	N40° 15′16.44"	E117° 44′50.88"	2503 ± 13		2576 ± 34
		LP129	Tonalitic gneiss	N40° 14′59.52"	E117° 44′32.1"	2523 ± 31	2523 ± 15	2532 ± 21, 3226–2710 Ma
		LP131	Tonalitic gneiss	N40° 14′56.64"	E117° 44′39.48"	2506 Ma	2865–2835, 2504 ± 24	2915 ± 17
		LP182	Granitic gneiss	N40° 15′6.18"	E117° 44′30.3"	2481 ± 17		2524 ± 29
		LP179	Granitic gneiss	N40° 14′41.46"	E117° 44′27.3"	2511 ± 17	2488 ± 36	3361–2567
		LP174	Granitic gneiss	N40° 14′59.88"	E117° 44′44.58"	2920 ± 28	2517 ± 18
Li et al., 2019	Qiuhuayu	JD1411	Dioritic gneiss	N40°15′15.867″	E118°5′40.802″	2540 ± 10	2473 ± 12, 2406 ± 11
	Xiaoguanzhuang	JD1403	Tonalitic gneiss	N40°14′54.217″	E117°43′53.673″	2533 ± 12	2476 ± 20, 2350 ± 13	2753 ± 10, 2785 ± 26
	Santunying	JD1346	Tonalitic gneiss	N40°23 ′16.986″	E118°10′39.487″	2503 ± 11	2480 ± 3, 2295 ± 40, 2403 ± 47	2625 ± 13
	Santunying	JD1343	Trondhjemitic gneiss	N40°23 ′16.986″	E118°10′39.487″	2521 ± 8	2476 ± 13
	Santunying	JD1439	Granitic gneiss	N40°2′36.097″	E118°29′48.086″	2469 ± 6	2485 ± 20, 2414 ± 28, 2358 ± 33
Li et al., 2024	Malanyu	YC223	Garnet clinopyroxene granulite	N40°13′19.20″	E117°41′12.48″		2469 ± 6, 1798 ± 5
Wang et al., 2019a	Longwan	J14-46c	Meta-websterite			3451 ± 3
Wang et al., 2019b	Maojiachang	16ZH-MJC-13	Syenogranite	N40°14′45.5″	E117°53′30.9″	2458 ± 17
		16ZH-LSG-1	Quartz vein	N40°14′09.5″	E117°54′44.3″	2466 ± 12
Wang et al., 2019c	Lulong	WJL03-2	Biotite plagioclase gneiss	N39°50′42″	E118°53′18″	2532 ± 22
		WJL05-2	Biotite plagioclase gneiss	N39°55′48″	E118°50′00″	2537 ± 24
		WJL02-2	Heterogeneous domain of migmatite	N39°48′42″	E118°52′00″	2535 ± 15
		WJL04-1	Heterogeneous domain of migmatite	N39°51′18″	E118°52′18″	2531 ± 24
		WJL03-1	Amphibolite	N39°49′54″	E118°51′30″		2477 ± 20
		WJL02-1	Granite	N39°48′36″	E118°52′00″	2473 ± 38
		WJL08-1	Granodiorite	N39°57′54″	E118°54′00″	2507 ± 21
Lu et al., 2020	Beidazhanzgi	J1850	Mafic granulite			2505 ± 45	2479 ± 14, 1950 ± 69, 1951 ± 62
Wan et al., 2021	Labashan	J2012	Granodioritic gneiss			3786 ± 4	3489 ± 9
		J2013	Granodioritic gneiss			3773 ± 6	3628 ± 11
Wu et al., 2022	Longwan	19JD-18	Peridotite				2532 ± 24
	Jiuying	19JD-08	Peridotite				2517 ± 31
		19JD-07	Granite dyke			2497 ± 6
Dong et al., 2024	Labashan	J2117	Trondhjemitic gneiss			3754 ± 14	3444 ± 13
		J2120	Trondhjemitic gneiss			3819 ± 16	3454 ± 7
		J2206	Trondhjemitic gneiss			3838 ± 7	3365 ± 20
		J2115	Granodioritic gneiss			3774 ± 6	3367 ± 12, 3084 ± 8
		J2215	Granodioritic gneiss			3773 ± 9
		J2111	Quartz monzogranitic gneiss			3775 ± 6
		J2230	Monzogranitic gneiss			3640 ± 8	3059 ± 7
		J2231	Monzogranitic gneiss			3782 ± 13
		J2216	Monzogranitic gneiss			3786 ± 18
Dong et al., 2025	Labashan	J2109	Tonalitie gneiss	N39°46'35.91"	E118°51'29.11"	3381 ± 11
		J2122	Tonalitic gneiss	N39°46'39.30"	E118°51'27.99"	3495 ± 12
		J2116	Banded trondhjemitic gneiss	N39°46'38.01"	E118°51'28.56"	3457 ± 14	3457 ± 14	3706 ± 42
		J2118	Trondhjemite gneiss	N39°46'38.13"	E118°51'28.07"	ca. 3450	3453 ± 13	3602–3489
		J2121	Trondhjemitic gneiss	N39°46'39.07"	E118°51'27.73"	ca. 3070	3074 ± 13
		J2205	Trondhjemitic gneiss	N39°46'36.11"	E118°51'28.01"	3513 ± 6	3403 ± 12
		J2125	Monzogranitic gneiss	N39°46'42.76"	E118°51'28.26"	3460 ± 6
		J2217	Banded monzogranitic gneiss	N39°46'44.26"	E118°51'28.23"	3491 ± 9		3779–3575
		J2114	Syenogranitic gneiss	N39°46'38.01"	E118°51'28.56"	3422 ± 6
		J2211	Syenogranitic gneiss	N39°46'38.86"	E118°51'28.23"	3502 ± 10		3762–3603
		J2214	Syenogranitic gneiss	N39°46'42.16"	E118°51'29.03"	2960 ± 7		3450–3055
		J2313	Syenogranitic gneiss	N39°46'44.82"	E118°51'29.08"	3407 ± 10		3888–3490
		J2113	Biotite-chlorite-hornblende schist	N39°46'35.91"	E118°51'29.11"		3450 ± 12	3660 ± 11
		J2127	Meta-gabbro	N39°46'42.28"	E118°51'28.45"		3447 ± 9, 3050 ± 8
		J2218	Meta-gabbro	N39°46'45.46"	E118°51'29.03"		3124 ± 4
		J2213	Meta-gabbro	N39°46'42.06"	E118°51'29.04"		3091 ± 8
Zhao et al., 2025a	Qianxi	19QX3	Tonalite gneiss			2533± 15
		19QX6-1	Tonalite gneiss			2562± 12	2539± 25	2668± 31
		19QX31-5	Tonalite gneiss			2552± 13	2485± 30
		19QX36-1	Trondhjemite gneiss			2523± 26	2488± 27
		19QX66-1	Tonalite gneiss			2512± 14	2501± 16
		19QX72-2	Tonalite gneiss			2537± 15	2533± 14
Zhao et al., 2025b	Labashan	23JD15-12	Trondhjemite			3533 ± 27
Reference
Huang, X., Ziwei, B., and DePaolo, D. J.: Sm-Nd isotope study of early Archean rocks, Qianan, Hebei Province, China, Geochimica et Cosmochimica Acta, 50, 625-631, https://doi.org/10.1016/0016-7037(86)90111-0, 1986.
Jahn, B. M., Auvray, B., Cornichet, J., Bai, Y. L., Shen, Q. H., and Liu, D. Y.: 3.5 Ga old amphibolites from eastern Hebei Province, China: Field occurrence, petrography, Sm-Nd isochron age and REE geochemistry, Precambrian Research, 34, 311-346, https://doi.org/10.1016/0301-9268(87)90006-4, 1987.
Geng, Y.S., Liu, F.L., and Yang, C.H.: Magmatic event at the end of the Archean in Eastern Hebei Province and its geological implications. Acta Geol. Sin. 80, 819-833, 2006 (in Chinese with English abstract).
Geng, Y. S., Yang, C. H., Du, L. L, Ren, L. D., and Song, H. X.: Late Neoarchean magmatism and crustal growth in eastern Hebei: Constraint from geochemistry, zircon U Pb ages and Hf isotope, Acta Geol. Sin., 1058-1082+1233-1241, 2018 (in Chinese with English abstract).
Yang, J. H., Wu, F. Y., Wilde, S. A., and Zhao, G.: Petrogenesis and geodynamics of Late Archean magmatism in eastern Hebei, eastern North China Craton: Geochronological, geochemical and Nd–Hf isotopic evidence, Precambrian Res., 167, 125-149, https://doi.org/10.1016/j.precamres.2008.07.004, 2008.
Li, T., Zhai, M., Peng, P., Chen, L., and Guo, J.: Ca. 2.5 billion year old coeval ultramafic–mafic and syenitic dykes in Eastern Hebei: Implications for cratonization of the North China Craton, Precambrian Res., 180, 143-155, https://doi.org/10.1016/j.precamres.2010.04.001, 2010.
Nutman, A. P., Wan, Y., Du, L., Friend, C. R. L., Dong, C., Xie, H., Wang, W., Sun, H., and Liu, D.: Multistage late Neoarchaean crustal evolution of the North China Craton, eastern Hebei, Precambrian Res., 189, 43-65, https://doi.org/10.1016/j.precamres.2011.04.005, 2011.
Lv, B., Zhai, M., Li, T., and Peng, P.: Zircon U–Pb ages and geochemistry of the Qinglong volcano-sedimentary rock series in Eastern Hebei: Implication for ∼2500Ma intra-continental rifting in the North China Craton, Precambrian Res., 208-211, 145-160, https://doi.org/10.1016/j.precamres.2012.04.002, 2012.
Guo, R., Liu, S., Santosh, M., Li, Q., Bai, X., and Wang, W.: Geochemistry, zircon U–Pb geochronology and Lu–Hf isotopes of metavolcanics from eastern Hebei reveal Neoarchean subduction tectonics in the North China Craton, Gondwana Res., 24, 664-686, https://doi.org/10.1016/j.gr.2012.12.025, 2013.
Guo, R., Liu, S.W., Bai, X., Zhang, L.F., Wang, W., Hu, F.Y., and Yan, M.: Geochemistry and zircon U-Pb chronology of Shuangshanzi Group in the eastern Hebei province, North China Craton: constraints on petrogenesis and tectonic setting. Acta Petrol. Sin. 30, 2885-2904, 2014 (in Chinese with English abstract).
Guo, R., Liu, S., Wyman, D., Bai, X., Wang, W., Yan, M., and Li, Q.: Neoarchean subduction: A case study of arc volcanic rocks in Qinglong-Zhuzhangzi area of the Eastern Hebei Province, North China Craton, Precambrian Res., 264, 36-62, https://doi.org/10.1016/j.precamres.2015.04.007, 2015.
Guo, R., Liu, S., Bai, X., and Wang, W.: A Neoarchean subduction recorded by the Eastern Hebei Precambrian basement, North China Craton: Geochemical fingerprints from metavolcanic rocks of the Saheqiao-Shangying-Qinglong supracrustal belt, J. Asian Earth Sci., 135, 347-369, https://doi.org/10.1016/j.jseaes.2017.01.007, 2017.
Bai, X., Liu, S., Guo, R., Zhang, L., and Wang, W.: Zircon U–Pb–Hf isotopes and geochemistry of Neoarchean dioritic–trondhjemitic gneisses, Eastern Hebei, North China Craton: Constraints on petrogenesis and tectonic implications, Precambrian Res., 251, 1-20, https://doi.org/10.1016/j.precamres.2014.05.027, 2014.
Bai, X., Liu, S., Guo, R., and Wang, W.: Zircon U–Pb–Hf isotopes and geochemistry of two contrasting Neoarchean charnockitic rock series in Eastern Hebei, North China Craton: Implications for petrogenesis and tectonic setting, Precambrian Res., 267, 72-93, https://doi.org/10.1016/j.precamres.2015.06.004, 2015.
Bai, X., Liu, S., Guo, R., and Wang, W.: A Neoarchean arc–back-arc system in Eastern Hebei, North China Craton: Constraints from zircon U–Pb–Hf isotopes and geochemistry of dioritic–tonalitic–trondhjemitic–granodioritic (DTTG) gneisses and felsic paragneisses, Precambrian Res., 273, 90-111, https://doi.org/10.1016/j.precamres.2015.12.003, 2016.
Bai, W., Dong, C., Nutman, A. P., Xie, H., Liu, D., and Wan, Y.: Timing of late Neoarchean to late Paleoproterozoic events in the North China Craton: SHRIMP U-Pb dating and LA-ICP-MS Hf isotope analysis of zircons from magmatic and metamorphic rocks in the Santunying area, eastern Hebei, Gondwana Res., 76, 348-372, https://doi.org/10.1016/j.gr.2019.06.005, 2019.
Duan, Z., Wei, C., and Qian, J.: Metamorphic P–T paths and Zircon U–Pb age data for the Paleoproterozoic metabasic dykes of high-pressure granulite facies from Eastern Hebei, North China Craton, Precambrian Res., 271, 295-310, https://doi.org/10.1016/j.precamres.2015.10.015, 2015.
Duan, Z., Wei, C., and Li, Z.: Metamorphic P–T paths and zircon u–pb ages of Paleoproterozoic metabasic dykes in eastern Hebei and northern Liaoning: Implications for the tectonic evolution of the North China Craton, Precambrian Res., 326, 124-141, https://doi.org/10.1016/j.precamres.2017.11.001, 2019.
Duan, Z., Wei, C., Li, Z., and Zhang, C.: Zircon U-Pb Dating and Metamorphism of Granitoid Gneisses and Supracrustal Rocks in Eastern Hebei, North China Craton, 12, 863, https://www.mdpi.com/2075-163X/12/7/863., 2022.
Fu, J., Liu, S., Chen, X., Bai, X., Guo, R., and Wang, W.: Petrogenesis of taxitic dioritic–tonalitic gneisses and Neoarchean crustal growth in Eastern Hebei, North China Craton, Precambrian Res., 284, 64-87, https://doi.org/10.1016/j.precamres.2016.08.002, 2016.
Fu, J., Liu, S., Wang, M., Chen, X., Guo, B., and Hu, F.: Late Neoarchean monzogranitic–syenogranitic gneisses in the Eastern Hebei–Western Liaoning Province, North China Craton: Petrogenesis and implications for tectonic setting, Precambrian Res., 303, 392-413, https://doi.org/10.1016/j.precamres.2017.05.002, 2017.
Fu, J., Liu, S., Zhang, B., Guo, R., and Wang, M.: A Neoarchean K-rich granitoid belt in the northern North China Craton, Precambrian Res., 328, 193-216, https://doi.org/10.1016/j.precamres.2019.04.021, 2019.
Fu, J., Liu, S., Sun, G., and Gao, L.: Two contrasting Neoarchean metavolcanic rock suites in eastern Hebei and their geodynamic implications for the northern North China Craton, Gondwana Res., 95, 45-71, https://doi.org/10.1016/j.gr.2021.02.023, 2021
Sun, H. Y., Xie, H. Q., Liu, S. J., Dong, C. Y., Liu, D. Y., and Wan, Y. S.: Archean magmatism and metamorphism in the Huangbaiyu-Yangyashan area, eastern Hebei Province: evidence from SHRIMP zircon U-Pb dating. Geol. Bull. China 35 (1), 27–42, 2016 (in Chinese with English abstract).
Yao, X. and Zhang, J.: A late Neoarchaean–early Palaeoproterozoic crustal thickening event in the eastern North China Craton: petrological and geochronological evidence from Eastern Hebei terrane, Int. Geol. Rev., 59, 502-522, 10.1080/00206814.2016.1233462, 2017.
Cui, X. H., Zhai, M. G., Guo, J. H., Zhao, L., Zhu, X. Y., Wang, H. Z., Huang, G. Y., and Ge, S. S.: Field occurrences and Nd isotopic characteristics of the meta-mafic-ultramafic rocks from the Caozhuang Complex, eastern Hebei: Implications for early Archean crustal evolution of the North China Craton, Precambrian Research, 310, 425-442, https://doi.org/10.1016/j.precamres.2018.03.006, 2018.
Liou, P., Guo, J., Huang, G., and Fan, W.: 2.9 Ga magmatism in Eastern Hebei, North China Craton, Precambrian Research, 326, 6-23, https://doi.org/10.1016/j.precamres.2017.11.002, 2019.
Liou, P. and Guo, J.: Deciphering the Mesoarchean to Neoarchean history of crustal growth and recycling in the Caochang region of the Eastern Hebei Province, North China Craton using combined zircon U–Pb and Lu-Hf isotope analysis, Lithos, 334-335, 281-294, https://doi.org/10.1016/j.lithos.2019.03.013, 2019.
Li, Z., Wei, C., Zhang, S., Yang, C., and Duan, Z.: Neoarchean granitoid gneisses in Eastern Hebei, North China Craton: Revisited, Precambrian Res., 324, 62-85, https://doi.org/10.1016/j.precamres.2019.01.020, 2019.
Li, Z., Wei, C., Yang, C., and Zhang, X.: A Deep Mantle Source for the Late Neoarchean Metamorphosed Basalts in Eastern Hebei, North China Craton: Insights from Whole-Rock Geochemistry and Sm-Nd Isotopes, and Zircon U-Pb-Hf Isotopes, J. Earth Sci-China., 35, 29-40, 10.1007/s12583-023-1807-5, 2024.
Wang, C., Song, S., Wei, C., Su, L., Allen, M. B., Niu, Y., Li, X.-H., and Dong, J.: Palaeoarchaean deep mantle heterogeneity recorded by enriched plume remnants, Nature Geosci., 12, 672-678, 10.1038/s41561-019-0410-y, 2019a.
Wang, J., Li, X., Ning, W., Kusky, T., Wang, L., Polat, A., and Deng, H.: Geology of a Neoarchean suture: Evidence from the Zunhua ophiolitic mélange of the Eastern Hebei Province, North China Craton, Geol. Soc. Am. Bull., 131, 1943-1964, 10.1130/b35138.1, 2019b.
Wang, W., Liu, F.-L., Ji, L., and Santosh, M.: Geochronology and geochemistry of the Neoarchean Lulong Complex in the eastern Hebei Province, North China Craton: Implications on regional crustal evolution, Precambrian Research, 323, 102-125, https://doi.org/10.1016/j.precamres.2019.01.013, 2019c.
Lu, H. and Wei, C.: Late Neoarchean or late Paleoproterozoic high-pressure granulite facies metamorphism from the East Hebei terrane, North China Craton, J. Asian Earth Sci., 190, 104195, https://doi.org/10.1016/j.jseaes.2019.104195, 2020.
Wan, Y. S., Xie, H. Q., Wang, H. C., Li, P. C., Chu, H., Xiao, Z. B., Dong, C. Y., Liu, S. J., Li, Y., Hao, G. M., and Liu, D. Y.: Discovery of ~3.8 Ga TTG rocks in eastern Hebei, North China Craton. Acta Geol. Sin. 95 (5), 1321-1333, 2021 (in Chinese with English abstract).
Wu, Z., Wang, C., Song, S., Allen, M. B., Kusky, T., and Su, L.: Ultrahigh-pressure peridotites record Neoarchean collisional tectonics, Earth Planet. Sci. Lett., 596, 117787, https://doi.org/10.1016/j.epsl.2022.117787, 2022.
Dong, C., Liu, S., Nutman, A. P., Li, P., Xie, H., Li, Y., Liu, D., and Wan, Y.: New discovery of 3.84–3.64 Ga diverse granitoids in eastern Hebei, North China Craton: Petrogenesis and significance, Soc. Am. Bull., 136, 5249-5261, 10.1130/B37553.1, 2024.
Dong, C., Li, P., Nutman, A. P., Xie, H., Liu, S., Li, Y., Liu, D., and Wan, Y.: New discovery of Paleoarchean-Mesoarchean magmatic rocks in eastern Hebei, North China Craton: Petrogenesis and tectonic environment, Precambrian Res., 427, 107870, https://doi.org/10.1016/j.precamres.2025.107870, 2025.
Zhao, D. Y, Cawood, P. A., Teng, F.-Z., Zhao, G., Xia, X. P., Sun, M., and Wang, X.: A two-stage mantle plume-sagduction origin of Archean continental crust revealed by water and oxygen isotopes of TTGs, Sci. Adv., 11, eadr9513, 10.1126/sciadv.adr9513, 2025a.
Zhao, C., Liu, J., Zhang, H., Zhang, C., Chen, J., Cui, D., and Zhang, J.: Low-pressure ∼3.53 Ga trondhjemite in the Eastern Hebei: Implications on the continental nucleus formation of the North China Craton, Precambrian Res., 417, 107668, https://doi.org/10.1016/j.precamres.2024.107668, 2025b.
