# Supplementary material for: Discovery of 2.45 Ga trondhjemitic gneiss in Eastern Hebei, North China Craton: A constraint on Precambrian crustal evolution
Source: Copernicus journal article supplement (doi:10.5194/egusphere-2025-5595), 2026-01-23
Supplement: Supplementary file 2 [file Supplementary Table S2.xlsx]

## Sheet: PlotDat2
Source sheet	Sheet1	0.2	2545.77	1	2527	17	0.85	2510
Plot name	Average1	23.8	2545.77	2	2540	21	1.15	2510
Plot Type	15			3	2524	16	1.15	2544
1st free col	8			4	2516	18	0.85	2544
Sigma Level	1			5	2552	19	0.85	2510
Absolute Errs	TRUE			6	2545	17	ErrBox	ErrBox
Symbol Type	1			7	2529	22	1.85	2519
Inverse Plot	FALSE			8	2537	19	2.15	2519
Color Plot	TRUE			9	2551.7	43.45	2.15	2561
3D plot	FALSE			10	2550	18	1.85	2561
Linear	FALSE			11	2535	24	1.85	2519
Data Range	K134:L156			12	2534	22	ErrBox	ErrBox
Filled Symbols	TRUE			13	2557	18	2.85	2508
ConcAge	FALSE			14	2570	21	3.15	2508
ConcSwap	FALSE			15	2566	19	3.15	2540
1st Symbol-row	1			16	2531	16	2.85	2540
				17	2555	21	2.85	2508
				18	2566	22	ErrBox	ErrBox
				19	2535	20	3.85	2498
				20	2566	18	4.15	2498
				21	2566	21	4.15	2534
				22	2567	21	3.85	2534
				23	2566	21	3.85	2498
				IsoLine	IsoLine	IsoLine	ErrBox	ErrBox
							4.85	2533
							5.15	2533
							5.15	2571
							4.85	2571
							4.85	2533
							ErrBox	ErrBox
							5.85	2528
							6.15	2528
							6.15	2562
							5.85	2562
							5.85	2528
							ErrBox	ErrBox
							6.85	2507
							7.15	2507
							7.15	2551
							6.85	2551
							6.85	2507
							ErrBox	ErrBox
							7.85	2518
							8.15	2518
							8.15	2556
							7.85	2556
							7.85	2518
							ErrBox	ErrBox
							8.85	2508.25
							9.15	2508.25
							9.15	2595.15
							8.85	2595.15
							8.85	2508.25
							ErrBox	ErrBox
							9.85	2532
							10.15	2532
							10.15	2568
							9.85	2568
							9.85	2532
							ErrBox	ErrBox
							10.85	2511
							11.15	2511
							11.15	2559
							10.85	2559
							10.85	2511
							ErrBox	ErrBox
							11.85	2512
							12.15	2512
							12.15	2556
							11.85	2556
							11.85	2512
							ErrBox	ErrBox
							12.85	2539
							13.15	2539
							13.15	2575
							12.85	2575
							12.85	2539
							ErrBox	ErrBox
							13.85	2549
							14.15	2549
							14.15	2591
							13.85	2591
							13.85	2549
							ErrBox	ErrBox
							14.85	2547
							15.15	2547
							15.15	2585
							14.85	2585
							14.85	2547
							ErrBox	ErrBox
							15.85	2515
							16.15	2515
							16.15	2547
							15.85	2547
							15.85	2515
							ErrBox	ErrBox
							16.85	2534
							17.15	2534
							17.15	2576
							16.85	2576
							16.85	2534
							ErrBox	ErrBox
							17.85	2544
							18.15	2544
							18.15	2588
							17.85	2588
							17.85	2544
							ErrBox	ErrBox
							18.85	2515
							19.15	2515
							19.15	2555
							18.85	2555
							18.85	2515
							ErrBox	ErrBox
							19.85	2548
							20.15	2548
							20.15	2584
							19.85	2584
							19.85	2548
							ErrBox	ErrBox
							20.85	2545
							21.15	2545
							21.15	2587
							20.85	2587
							20.85	2545
							ErrBox	ErrBox
							21.85	2546
							22.15	2546
							22.15	2588
							21.85	2588
							21.85	2546
							ErrBox	ErrBox
							22.85	2545
							23.15	2545
							23.15	2587
							22.85	2587
							22.85	2545
							ErrBox	ErrBox

## Sheet: Sheet1
Supplementary Table S2. LA-ICP-MS zircon U-Pb data for the 2.45 Gatrondhjemitic gneiss in Qiuhuayu area of Eastern Hebei
Spot	Th	U	Th/U	Isotopic ratios						Age (Ma)						Concordance (%)
	(ppm)	(ppm)		207Pb/206Pb	1σ	207Pb/235U	1σ	206Pb/238U	1σ	207Pb/206Pb	1σ	207Pb/235U	1σ	206Pb/238U	1σ
Magmatic zircons
22ZH23-1-002	36.1653	113.857	0.317639	0.159703	0.00378817	10.1958	0.222042	0.462468	0.00583906	2453.7	39.66	2452.7	20.2067	2450.45	25.772	99
22ZH23-1-006	59.3666	137.393	0.432095	0.160233	0.00411216	10.2073	0.266373	0.458396	0.00720509	2458.32	43.9825	2453.74	24.191	2432.47	31.8751	99
22ZH23-1-007	68.2315	129.932	0.525131	0.158959	0.00375416	10.4091	0.245857	0.470855	0.00555757	2455.55	39.35	2471.86	21.9452	2487.31	24.3945	99
22ZH23-1-008	60.3785	165.081	0.365751	0.157996	0.00343786	10.0448	0.211463	0.458095	0.00512152	2435.18	37.0325	2438.91	19.511	2431.14	22.6809	99
22ZH23-1-010	40.1458	120.554	0.33301	0.160977	0.00341378	10.4415	0.224261	0.467659	0.00561461	2465.73	35.03	2474.74	19.9732	2473.29	24.6972	99
22ZH23-1-011	49.5977	139.67	0.355107	0.160952	0.00314699	10.8133	0.225956	0.484275	0.00611212	2465.73	33.0275	2507.21	19.4961	2545.86	26.5814	98
22ZH23-1-012	67.8393	156.145	0.434462	0.161888	0.00325972	10.4865	0.214375	0.467514	0.00525388	2475.61	33.18	2478.73	19.0251	2472.65	23.1175	99
22ZH23-1-013	47.4416	153.876	0.308311	0.16339	0.00344985	10.8718	0.248534	0.479073	0.00589247	2491.05	36.2675	2512.23	21.3253	2523.23	25.7179	99
22ZH23-1-014	28.8658	91.7076	0.31476	0.159939	0.00424196	10.4312	0.311133	0.469378	0.00729767	2455.24	44.7525	2473.83	27.6876	2480.83	32.0441	99
22ZH23-1-015	57.3241	164.989	0.347443	0.161263	0.00397968	10.4885	0.27415	0.468604	0.00617152	2468.82	41.205	2478.91	24.2885	2477.43	27.1228	99
22ZH23-1-016	182.566	259.783	0.702765	0.158129	0.00339466	10.2713	0.241056	0.468711	0.00674081	2435.49	36.4175	2459.53	21.78	2477.9	29.6168	99
22ZH23-1-017	140.43	261.362	0.537301	0.159766	0.00311029	10.5158	0.235985	0.47417	0.00657125	2453.39	33.4875	2481.31	20.8758	2501.82	28.7672	99
22ZH23-1-019	34.0269	97.8197	0.347853	0.159491	0.00332458	10.2611	0.220092	0.465175	0.00564402	2450.31	35.185	2458.6	19.9155	2462.37	24.8679	99
22ZH23-1-020	93.5433	163.154	0.573343	0.154339	0.00326332	9.7472	0.221393	0.454976	0.00516939	2394.76	36.5725	2411.17	20.9811	2417.34	22.9407	99
22ZH23-1-021	35.1611	105.656	0.332789	0.159548	0.00349174	10.8874	0.250728	0.492067	0.00562642	2450.92	37.0375	2513.56	21.4844	2579.61	24.3486	97
22ZH23-1-022	40.3263	117.623	0.342844	0.156373	0.00415687	9.98576	0.266569	0.460574	0.0058321	2416.97	44.5925	2433.47	24.6938	2442.09	25.7744	99
22ZH23-1-023	26.909	90.0011	0.298985	0.152844	0.00392333	9.86453	0.262979	0.465031	0.00555143	2388.89	38.4225	2422.2	24.6327	2461.73	24.4635	98
22ZH23-1-024	56.2072	132.964	0.422725	0.158639	0.00336266	10.312	0.225712	0.469255	0.00557985	2442.59	36.1075	2463.18	20.3295	2480.29	24.5184	99
22ZH23-1-025	22.6287	77.0265	0.293778	0.157797	0.00362162	10.1909	0.223597	0.467725	0.00560409	2432.4	38.885	2452.25	20.3561	2473.58	24.65	99
22ZH23-1-026	51.69	153.478	0.336791	0.158237	0.00287654	10.3373	0.194844	0.470584	0.00456554	2436.72	35.9575	2465.45	17.5309	2486.12	20.0583	99
22ZH23-1-027	53.9898	160.797	0.335763	0.159579	0.00292836	10.7794	0.2005	0.486788	0.0045684	2450.92	31.635	2504.3	17.3667	2556.77	19.8557	97
22ZH23-1-029	95.208	281.278	0.338484	0.155034	0.00286592	10.1299	0.19485	0.470858	0.00530144	2402.16	30.3975	2446.7	17.8538	2487.32	23.2737	98
22ZH23-1-030	48.5386	137.385	0.353303	0.160964	0.00336021	10.7493	0.244891	0.480596	0.00632859	2465.73	35.185	2501.7	21.2318	2529.86	27.5881	98
Captured zircons
22ZH23-1-001	75.8424	149.797	0.506301	0.168026	0.00331108	11.0904	0.235533	0.476165	0.00549029	2537.96	33.335	2530.76	19.8553	2510.54	24.0144	99
22ZH23-1-003	60.3257	137.175	0.439773	0.171189	0.00353006	11.52	0.239417	0.486146	0.00642109	2569.44	34.5675	2566.2	19.4952	2553.98	27.8867	99
22ZH23-1-004	251.46	321.607	0.781885	0.1702	0.00321195	11.2181	0.222065	0.473799	0.00516546	2561.11	31.79	2541.42	18.5353	2500.2	22.6341	98
22ZH23-1-005	163.029	231.787	0.703356	0.165425	0.00337412	11.212	0.229417	0.487806	0.00586157	2522.22	34.26	2540.92	19.1532	2561.18	25.4348	99
22ZH23-1-009	38.492	187.861	0.204895	0.169452	0.00326597	11.2902	0.227491	0.479034	0.00533479	2553.7	32.4075	2547.4	18.8743	2523.06	23.2917	99
