# Supplementary material for: Discovery of 2.45 Ga trondhjemitic gneiss in Eastern Hebei, North China Craton: A constraint on Precambrian crustal evolution
Source: Copernicus journal article supplement (doi:10.5194/egusphere-2025-5595), 2026-01-23
Supplement: Supplementary file 3 [file Supplementary Table S3.xlsx]

## Sheet: Sheet1
Supplementary Table S3. Zircon rare earth elements (ppm) for the 2.45 Gatrondhjemitic gneiss in Qiuhuayu area of Eastern Hebei
Spot	La	Ce	Pr	Nd	Sm	Eu	Gd	Tb	Dy	Ho	Er	Tm	Yb	Lu	Hf
22ZH10-1
Magmatic zircons
22ZH23-1-002	0.0231873	14.0126	0.0366337	0.785431	2.38803	1.40062	20.1929	6.00061	68.6977	23.7542	112.934	22.5102	212.48	41.1204	9814.84
22ZH23-1-006	0.030837	19.5572	0.0543322	1.01246	3.09459	1.98995	24.7811	7.72072	79.8567	27.3384	114.864	23.0482	201.143	37.0635	9859.51
22ZH23-1-007	0.176978	14.512	0.091935	1.09383	2.55957	1.75069	21.0785	6.30696	68.2122	23.5224	104.226	20.8733	184.571	35.6566	10001.6
22ZH23-1-008	0.00928494	9.44468	0.0197516	0.301638	0.813653	0.211422	4.07163	1.11154	12.1888	4.35232	22.3104	5.2204	56.4272	12.3414	11522.1
22ZH23-1-010	0.0299408	12.0758	0.0547489	0.951623	2.95891	1.82571	21.6605	7.04156	79.7462	28.349	133.305	26.8171	242.219	46.9275	10252.6
22ZH23-1-011	0.0476272	15.3002	0.0787933	0.994645	3.31629	1.8063	22.8577	7.20954	83.0135	29.6864	132.456	26.9622	240.625	45.2309	10538.3
22ZH23-1-012	0.121605	15.6522	0.0793047	0.99065	3.68108	2.01227	25.4834	7.77445	87.2872	29.0658	132.549	26.3329	236.737	43.7121	10323.8
22ZH23-1-013	0.00723957	16.9962	0.0574849	0.946554	3.54694	2.0951	24.1653	7.35291	84.4079	27.6957	124.34	24.6876	224.967	41.5769	9794.89
22ZH23-1-014	0.0971962	10.1298	0.053593	0.679122	2.49222	1.40965	16.0636	4.89481	57.2977	20.5281	93.57	19.6907	185.745	35.1385	9570.12
22ZH23-1-015	0.0336471	17.9472	0.111326	1.46731	4.02743	2.06723	25.2165	7.44815	86.6571	29.4846	132.972	26.4959	237.58	43.1722	10205.1
22ZH23-1-016	0.0616998	20.8192	0.0393714	1.23902	4.55109	2.48505	30.7692	9.02999	94.168	31.2009	137.342	26.5427	229.953	41.4706	10661.9
22ZH23-1-017	0.0246623	18.353	0.0522081	0.810408	3.74294	1.92064	27.4364	8.25007	92.2649	31.2182	129.267	25.5814	222.073	39.8826	11047.8
22ZH23-1-019	0.0191434	11.1738	0.0207856	0.776371	2.85002	1.55759	20.6182	5.80603	64.9943	22.6934	101.953	21.4433	190.402	37.1017	10247
22ZH23-1-020	0.0501961	17.4026	0.0641781	0.845901	3.20383	2.0396	26.9562	7.79665	82.774	27.5511	124.188	24.4322	222.624	40.8754	10326
22ZH23-1-021	0.00459181	9.58265	0.0550843	1.07504	3.21257	1.81977	19.1039	5.42973	61.6746	21.607	97.2286	19.7915	179.046	34.9389	10357.3
22ZH23-1-022	0.0697117	10.6609	0.0807458	1.1015	2.38845	1.65101	16.8198	4.95544	59.4008	19.5446	92.4109	19.0713	177.432	35.4259	10102.4
22ZH23-1-023	0.0164386	10.2979	0.0362724	0.712205	2.27161	1.26446	17.2652	5.02469	55.9037	20.6149	98.8125	20.5065	190.057	37.4667	10128.3
22ZH23-1-024	0.0476116	15.8236	0.0968967	1.99424	5.72212	3.1686	34.2419	9.93468	107.569	36.5131	162.457	32.4435	280.84	53.5612	9424.21
22ZH23-1-025	0	8.75047	0.0225678	0.677739	2.1278	1.26772	12.5669	4.04128	46.1785	16.2674	77.4245	16.2362	151.032	30.6472	9918.69
22ZH23-1-026	0.0353246	14.0356	0.0452196	0.866067	2.90776	1.71808	23.4995	7.74174	87.6645	30.7981	138.928	27.7278	242.615	45.6108	10530.5
22ZH23-1-027	0.0101665	7.95365	0.0130874	0.368686	0.781909	0.195807	3.6847	1.0549	11.9108	4.21134	21.5355	5.19863	52.3818	11.6572	11565.1
22ZH23-1-029	0.0591477	19.8186	0.0580131	0.979374	3.93869	2.17761	36.2217	11.74	138.574	48.5633	212.675	41.6788	349.42	62.6529	11082.1
22ZH23-1-030	0.0164231	13.9994	0.0364887	0.818263	3.16013	1.92089	23.1043	7.34364	81.3057	30.0021	134.748	27.3729	241.882	46.0726	10203.1
Captured zircons
22ZH23-1-001	2.12011	20.2263	0.670081	3.58804	3.67353	2.00635	23.373	6.888	74.4935	25.7644	112.238	22.9283	200.131	37.2828	9861.77
22ZH23-1-003	0	17.3423	0.0474641	1.15148	4.57039	2.63575	33.0656	9.86085	109.174	35.1668	156.204	30.4862	267.87	49.0879	9621.34
22ZH23-1-004	0.0108755	26.5913	0.0919952	1.94948	5.94666	3.17243	31.1424	8.24358	83.2247	26.1222	108.486	20.7298	178.888	32.2856	9809.65
22ZH23-1-005	0.0121466	24.7305	0.057564	1.58321	5.53809	3.43695	40.1646	11.3423	120.894	39.7124	166.795	32.4298	277.779	50.0978	9630.18
22ZH23-1-009	0.0026031	9.28238	0.0312246	0.760198	2.5662	1.67684	22.5206	7.34465	90.5571	33.1147	158.736	33.3481	302.728	57.7511	11316
