# Supplementary material for: Discovery of 2.45 Ga trondhjemitic gneiss in Eastern Hebei, North China Craton: A constraint on Precambrian crustal evolution
Source: Copernicus journal article supplement (doi:10.5194/egusphere-2025-5595), 2026-01-23
Supplement: Supplementary file 4 [file Supplementary Table S4.xlsx]

## Sheet: Sheet1
Supplementary Table S4. Major- (wt.%) and trace-element (ppm) compositions for the 2.45 Gatrondhjemitic gneiss in Qiuhuayu area of Eastern Hebei
Sample	22ZH23-1	22ZH23-3	22ZH23-4	22ZH23-5
Location	N 40°15′38.47″, E 118°07′25.84″
SiO2	66.9881	69.219	69.894	68.8133
TiO2	0.23008	0.262	0.23	0.223386
Al2O3	18.305	17.19	16.641	17.4524
Fe2O3T	1.57988	1.761	1.606	1.5302
MnO	0.015792	0.017	0.017	0.0129532
MgO	0.524461	0.584	0.578	0.443621
CaO	3.57425	3.553	3.183	3.20851
Na2O	6.8411	6.334	6.266	6.34246
K2O	0.449774	0.651	0.757	0.91163
P2O5	0.0513722	0.062	0.061	0.060113
LOI	0.733745	0.329883	0.362622	0.401579
Total	99.2935	99.9629	99.5956	99.4001
Na2O+K2O	7.29087	6.985	7.023	7.25409
Na2O/K2O	15.2101	9.72965	8.27741	6.95727
A/CNK	1.00361	0.977586	0.983843	1.01151
Mg#	39.6715	39.6476	41.6207	36.4794
Li	4.20727	3.68619	6.04932	3.5904
Be	0.754958	0.72896	0.596409	0.728901
Sc	1.52637	3.3195	2.58391	1.34636
V	20.8609	23.3198	19.6827	19.1626
Cr	9.48644	5.87137	5.09077	4.80337
Co	3.62545	3.60212	3.27021	2.92441
Ni	5.12795	3.53837	2.82224	3.12273
Cu	5.88184	6.00161	5.50667	10.6329
Zn	26.7969	27.9859	42.3394	17.6108
Ga	19.95	17.1253	15.5442	17.1846
Rb	1.33994	2.13914	3.33289	0.978595
Sr	1248.24	1213.6	992.037	637.038
Y	1.32863	1.48002	1.06239	1.45636
Zr	102.975	128.14	113.038	110.502
Nb	0.78412	0.943434	0.653926	0.786076
Cs	0.20996	0.0853994	0.0971029	0.159987
Ba	312.794	357.591	405.157	313.046
La	5.90847	6.29172	4.4795	4.84404
Ce	11.2947	11.6027	8.0106	9.38874
Pr	1.2618	1.33484	0.989616	1.06967
Nd	4.69356	5.37806	3.77119	4.08513
Sm	0.761201	0.983767	0.646243	0.717589
Eu	0.499103	0.451484	0.389939	0.40919
Gd	0.559867	0.646412	0.446004	0.542394
Tb	0.056763	0.0664687	0.0457369	0.0590557
Dy	0.244966	0.311582	0.228223	0.270371
Ho	0.0434318	0.0581723	0.0369035	0.0473819
Er	0.121045	0.1639	0.106036	0.131322
Tm	0.0167991	0.021379	0.0147725	0.0182052
Yb	0.108846	0.159257	0.109637	0.122561
Lu	0.0176643	0.0232725	0.0168231	0.0193685
Hf	2.31321	2.96351	2.64145	2.64058
Ta	0.038919	0.100438	0.0448236	0.039307
Pb	4.46061	3.36279	3.92962	4.12166
Th	0.0217184	0.0341053	0.022744	0.0517893
U	0.0437249	0.0484351	0.0409785	0.0611397
ΣREE	25.5882	27.493	19.2912	21.725
Sr/Y	939.497	819.992	933.777	437.418
Nb/Ta	20.1475	9.39321	14.5889	19.9984
La/Yb	54.2827	39.5067	40.8574	39.5234
(La/Yb)N	38.937	28.3382	29.307	28.3501
δCe	2.33734	1.73087	2.22051	2.00518
δEu	1.0142	0.98162	0.932829	1.01126
A/CNK =molecular Al / (Ca+ Na+ K); Mg# = 100 × Mg2+ / (Mg2+ + total Fe2+); (La/Yb)N are Chondrite-normalized values (from McDonough and Sun, 1995); δEu = EuN / (SmN * GdN)1/2; δCe = CeN / (LaN * PrN)1/2.
