# Supplementary material for: Discovery of 2.45 Ga trondhjemitic gneiss in Eastern Hebei, North China Craton: A constraint on Precambrian crustal evolution
Source: Copernicus journal article supplement (doi:10.5194/egusphere-2025-5595), 2026-01-23
Supplement: Supplementary file 5 [file Supplementary Table S5.xlsx]

## Sheet: PlotDat2
Source sheet	Sheet1	5	1.0981e-07	5.72	0	5	0
Plot name	ProbDens1	5.0012	1.12899e-07	5.96	0	7.3988	0
Plot Type	16	5.0024	1.16072e-07	5.96	1
1st free col	9	5.0036	1.19331e-07	5.72	1
Sigma Level	1	5.0048	1.22678e-07	5.72	0
Absolute Errs	TRUE	5.006	1.26116e-07	ErrBox	ErrBox
Symbol Type	1	5.0072	1.29646e-07	5.96	0
Inverse Plot	FALSE	5.0084	1.33271e-07	6.2	0
Color Plot	TRUE	5.0096	1.36993e-07	6.2	3
3D plot	FALSE	5.0108	1.40816e-07	5.96	3
Linear	FALSE	5.012	1.44742e-07	5.96	0
Data Range	M3:N17	5.0132	1.48773e-07	ErrBox	ErrBox
Filled Symbols	TRUE	5.0144	1.52911e-07	6.2	0
ConcAge	FALSE	5.0156	1.57161e-07	6.44	0
ConcSwap	FALSE	5.0168	1.61524e-07	6.44	8
1st Symbol-row	1	5.018	1.66004e-07	6.2	8
		5.0192	1.70603e-07	6.2	0
		5.0204	1.75325e-07	ErrBox	ErrBox
		5.0216	1.80172e-07	6.44	0
		5.0228	1.85148e-07	6.68	0
		5.024	1.90257e-07	6.68	3
		5.0252	1.95501e-07	6.44	3
		5.0264	2.00884e-07	6.44	0
		5.0276	2.06409e-07	ErrBox	ErrBox
		5.0288	2.12081e-07
		5.03	2.17902e-07
		5.0312	2.23877e-07
		5.0324	2.30009e-07
		5.0336	2.36303e-07
		5.0348	2.42762e-07
		5.036	2.49391e-07
		5.0372	2.56194e-07
		5.0384	2.63175e-07
		5.0396	2.70338e-07
		5.0408	2.77689e-07
		5.042	2.85232e-07
		5.0432	2.92972e-07
		5.0444	3.00913e-07
		5.0456	3.09061e-07
		5.0468	3.17421e-07
		5.048	3.25998e-07
		5.0492	3.34798e-07
		5.0504	3.43825e-07
		5.0516	3.53086e-07
		5.0528	3.62586e-07
		5.054	3.72332e-07
		5.0552	3.82329e-07
		5.0564	3.92584e-07
		5.0576	4.03102e-07
		5.0588	4.13891e-07
		5.06	4.24956e-07
		5.0612	4.36306e-07
		5.0624	4.47946e-07
		5.0636	4.59884e-07
		5.0648	4.72126e-07
		5.066	4.84682e-07
		5.0672	4.97557e-07
		5.0684	5.1076e-07
		5.0696	5.24299e-07
		5.0708	5.38182e-07
		5.072	5.52418e-07
		5.0732	5.67014e-07
		5.0744	6.50284e-07
		5.0756	6.68406e-07
		5.0768	6.87025e-07
		5.078	7.06154e-07
		5.0792	7.25806e-07
		5.0804	7.45996e-07
		5.0816	7.66739e-07
		5.0828	7.8805e-07
		5.084	8.09943e-07
		5.0852	8.32434e-07
		5.0864	8.5554e-07
		5.0876	8.79277e-07
		5.0888	9.03662e-07
		5.09	9.28713e-07
		5.0912	1.02114e-06
		5.0924	1.05001e-06
		5.0936	1.07969e-06
		5.0948	1.1102e-06
		5.096	1.14157e-06
		5.0972	1.1738e-06
		5.0984	1.20694e-06
		5.0996	1.24101e-06
		5.1008	1.27602e-06
		5.102	1.31201e-06
		5.1032	1.349e-06
		5.1044	1.38703e-06
		5.1056	1.42612e-06
		5.1068	1.46629e-06
		5.108	1.50759e-06
		5.1092	1.55003e-06
		5.1104	1.59366e-06
		5.1116	1.6385e-06
		5.1128	1.68459e-06
		5.114	1.73197e-06
		5.1152	1.78066e-06
		5.1164	1.8307e-06
		5.1176	1.88214e-06
		5.1188	1.935e-06
		5.12	1.98934e-06
		5.1212	2.04519e-06
		5.1224	2.10258e-06
		5.1236	2.16157e-06
		5.1248	2.2222e-06
		5.126	2.28451e-06
		5.1272	2.34855e-06
		5.1284	2.41437e-06
		5.1296	2.48201e-06
		5.1308	2.55153e-06
		5.132	2.62297e-06
		5.1332	2.6964e-06
		5.1344	2.77185e-06
		5.1356	2.8494e-06
		5.1368	2.92909e-06
		5.138	3.01099e-06
		5.1392	3.09516e-06
		5.1404	3.18165e-06
		5.1416	3.27054e-06
		5.1428	3.36188e-06
		5.144	3.45575e-06
		5.1452	3.55221e-06
		5.1464	3.65133e-06
		5.1476	3.75319e-06
		5.1488	3.85786e-06
		5.15	3.96542e-06
		5.1512	4.14313e-06
		5.1524	4.25878e-06
		5.1536	4.37762e-06
		5.1548	4.49974e-06
		5.156	4.62523e-06
		5.1572	4.75418e-06
		5.1584	4.88668e-06
		5.1596	5.02283e-06
		5.1608	5.16273e-06
		5.162	5.30648e-06
		5.1632	5.45419e-06
		5.1644	5.60597e-06
		5.1656	5.76191e-06
		5.1668	5.92215e-06
		5.168	6.08678e-06
		5.1692	6.25594e-06
		5.1704	6.42974e-06
		5.1716	6.60831e-06
		5.1728	6.79178e-06
		5.174	6.98028e-06
		5.1752	7.17394e-06
		5.1764	7.37291e-06
		5.1776	7.64473e-06
		5.1788	7.85672e-06
		5.18	8.07451e-06
		5.1812	8.29825e-06
		5.1824	8.52811e-06
		5.1836	8.76425e-06
		5.1848	9.00684e-06
		5.186	9.25605e-06
		5.1872	9.51206e-06
		5.1884	9.77505e-06
		5.1896	1.00452e-05
		5.1908	1.03227e-05
		5.192	1.06078e-05
		5.1932	1.09006e-05
		5.1944	1.12014e-05
		5.1956	1.15104e-05
		5.1968	1.18278e-05
		5.198	1.21538e-05
		5.1992	1.24886e-05
		5.2004	1.28325e-05
		5.2016	1.31858e-05
		5.2028	1.35486e-05
		5.204	1.39212e-05
		5.2052	1.43039e-05
		5.2064	1.4697e-05
		5.2076	1.51007e-05
		5.2088	1.55153e-05
		5.21	1.5941e-05
		5.2112	1.63783e-05
		5.2124	1.68274e-05
		5.2136	1.73566e-05
		5.2148	1.78329e-05
		5.216	1.83221e-05
		5.2172	1.88244e-05
		5.2184	1.93403e-05
		5.2196	1.987e-05
		5.2208	2.04141e-05
		5.222	2.09727e-05
		5.2232	2.15464e-05
		5.2244	2.21354e-05
		5.2256	2.27403e-05
		5.2268	2.33613e-05
		5.228	2.3999e-05
		5.2292	2.46538e-05
		5.2304	2.53261e-05
		5.2316	2.60847e-05
		5.2328	2.67958e-05
		5.234	2.75258e-05
		5.2352	2.82754e-05
		5.2364	2.9045e-05
		5.2376	2.98351e-05
		5.2388	3.06462e-05
		5.24	3.14789e-05
		5.2412	3.23338e-05
		5.2424	3.32113e-05
		5.2436	3.41122e-05
		5.2448	3.50369e-05
		5.246	3.59862e-05
		5.2472	3.69606e-05
		5.2484	3.79607e-05
		5.2496	3.89873e-05
		5.2508	4.0109e-05
		5.252	4.11929e-05
		5.2532	4.23053e-05
		5.2544	4.3447e-05
		5.2556	4.46188e-05
		5.2568	4.58214e-05
		5.258	4.70556e-05
		5.2592	4.83222e-05
		5.2604	4.96221e-05
		5.2616	5.0956e-05
		5.2628	5.23249e-05
		5.264	5.37295e-05
		5.2652	5.51709e-05
		5.2664	5.66499e-05
		5.2676	5.81674e-05
		5.2688	5.97245e-05
		5.27	6.13222e-05
		5.2712	6.29614e-05
		5.2724	6.46432e-05
		5.2736	6.64368e-05
		5.2748	6.82093e-05
		5.276	7.00278e-05
		5.2772	7.18934e-05
		5.2784	7.38072e-05
		5.2796	7.57704e-05
		5.2808	7.77842e-05
		5.282	7.985e-05
		5.2832	8.19689e-05
		5.2844	8.41424e-05
		5.2856	8.63716e-05
		5.2868	8.86581e-05
		5.288	9.10031e-05
		5.2892	9.34082e-05
		5.2904	9.58748e-05
		5.2916	9.84043e-05
		5.2928	0.000100998
		5.294	0.000103659
		5.2952	0.000106387
		5.2964	0.000109184
		5.2976	0.000112052
		5.2988	0.000114993
		5.3	0.000118009
		5.3012	0.000121101
		5.3024	0.00012427
		5.3036	0.00012752
		5.3048	0.00013092
		5.306	0.000134337
		5.3072	0.000137841
		5.3084	0.000141433
		5.3096	0.000145114
		5.3108	0.000148888
		5.312	0.000152756
		5.3132	0.000156721
		5.3144	0.000160785
		5.3156	0.00016495
		5.3168	0.000169219
		5.318	0.000173594
		5.3192	0.000178077
		5.3204	0.000182671
		5.3216	0.00018738
		5.3228	0.000192204
		5.324	0.000197148
		5.3252	0.000202213
		5.3264	0.000207403
		5.3276	0.000212721
		5.3288	0.000218169
		5.33	0.000223751
		5.3312	0.000229469
		5.3324	0.000235327
		5.3336	0.000241328
		5.3348	0.000247476
		5.336	0.000253772
		5.3372	0.000260222
		5.3384	0.000266828
		5.3396	0.000273595
		5.3408	0.000280525
		5.342	0.000287622
		5.3432	0.00029489
		5.3444	0.000302334
		5.3456	0.000309956
		5.3468	0.000317761
		5.348	0.000325753
		5.3492	0.000333937
		5.3504	0.000342316
		5.3516	0.000350895
		5.3528	0.000359678
		5.354	0.00036867
		5.3552	0.000377876
		5.3564	0.0003873
		5.3576	0.000396946
		5.3588	0.000406821
		5.36	0.000416928
		5.3612	0.000427274
		5.3624	0.000437862
		5.3636	0.000448699
		5.3648	0.00045979
		5.366	0.000471141
		5.3672	0.000482756
		5.3684	0.000494643
		5.3696	0.000506805
		5.3708	0.000519251
		5.372	0.000531985
		5.3732	0.000545014
		5.3744	0.000558344
		5.3756	0.000571981
		5.3768	0.000585933
		5.378	0.000600205
		5.3792	0.000614805
		5.3804	0.000629739
		5.3816	0.000645015
		5.3828	0.000660639
		5.384	0.00067662
		5.3852	0.000692964
		5.3864	0.000709679
		5.3876	0.000726772
		5.3888	0.000744253
		5.39	0.000762128
		5.3912	0.000780406
		5.3924	0.000799095
		5.3936	0.000818203
		5.3948	0.00083774
		5.396	0.000857714
		5.3972	0.000878134
		5.3984	0.000899008
		5.3996	0.000920347
		5.4008	0.00094216
		5.402	0.000964456
		5.4032	0.000987244
		5.4044	0.00101054
		5.4056	0.00103434
		5.4068	0.00105867
		5.408	0.00108353
		5.4092	0.00110894
		5.4104	0.0011349
		5.4116	0.00116143
		5.4128	0.00118853
		5.414	0.00121622
		5.4152	0.00124459
		5.4164	0.00127349
		5.4176	0.00130303
		5.4188	0.00133319
		5.42	0.00136408
		5.4212	0.00139556
		5.4224	0.00142772
		5.4236	0.00146056
		5.4248	0.0014941
		5.426	0.00152836
		5.4272	0.00156334
		5.4284	0.00159907
		5.4296	0.00163555
		5.4308	0.0016728
		5.432	0.00171083
		5.4332	0.00174967
		5.4344	0.00178932
		5.4356	0.00182979
		5.4368	0.00187112
		5.438	0.0019133
		5.4392	0.00195636
		5.4404	0.00200031
		5.4416	0.00204518
		5.4428	0.00209097
		5.444	0.0021377
		5.4452	0.00218539
		5.4464	0.00223406
		5.4476	0.00228373
		5.4488	0.00233441
		5.45	0.00238612
		5.4512	0.00243889
		5.4524	0.00249272
		5.4536	0.00254765
		5.4548	0.00260368
		5.456	0.00266084
		5.4572	0.00271915
		5.4584	0.00277863
		5.4596	0.00283929
		5.4608	0.00290117
		5.462	0.00296428
		5.4632	0.00302865
		5.4644	0.00309428
		5.4656	0.00316122
		5.4668	0.00322947
		5.468	0.00329907
		5.4692	0.00337004
		5.4704	0.00344239
		5.4716	0.00351615
		5.4728	0.00359136
		5.474	0.00366802
		5.4752	0.00374617
		5.4764	0.0038259
		5.4776	0.0039071
		5.4788	0.00398986
		5.48	0.00407421
		5.4812	0.00416018
		5.4824	0.00424779
		5.4836	0.00433707
		5.4848	0.00442804
		5.486	0.00452074
		5.4872	0.00461519
		5.4884	0.00471143
		5.4896	0.00480947
		5.4908	0.00490936
		5.492	0.00501111
		5.4932	0.00511476
		5.4944	0.00522034
		5.4956	0.00532789
		5.4968	0.00543742
		5.498	0.00554898
		5.4992	0.0056626
		5.5004	0.0057783
		5.5016	0.00589612
		5.5028	0.0060161
		5.504	0.00613826
		5.5052	0.00626265
		5.5064	0.00638929
		5.5076	0.00651822
		5.5088	0.00664948
		5.51	0.0067831
		5.5112	0.00691911
		5.5124	0.00705756
		5.5136	0.00719848
		5.5148	0.0073419
		5.516	0.00748788
		5.5172	0.00763643
		5.5184	0.0077876
		5.5196	0.00794144
		5.5208	0.00809797
		5.522	0.00825725
		5.5232	0.0084193
		5.5244	0.00858417
		5.5256	0.0087519
		5.5268	0.00892253
		5.528	0.00909611
		5.5292	0.00927268
		5.5304	0.00945227
		5.5316	0.00963493
		5.5328	0.00982071
		5.534	0.0100096
		5.5352	0.0102018
		5.5364	0.0103972
		5.5376	0.0105959
		5.5388	0.0107979
		5.54	0.0110033
		5.5412	0.0112121
		5.5424	0.0114244
		5.5436	0.0116403
		5.5448	0.0118597
		5.546	0.0120827
		5.5472	0.0123095
		5.5484	0.0125399
		5.5496	0.0127741
		5.5508	0.0130121
		5.552	0.013254
		5.5532	0.0134998
		5.5544	0.0137496
		5.5556	0.0140034
		5.5568	0.0142613
		5.558	0.0145233
		5.5592	0.0147895
		5.5604	0.0150599
		5.5616	0.0153346
		5.5628	0.0156137
		5.564	0.0158971
		5.5652	0.016185
		5.5664	0.0164775
		5.5676	0.0167745
		5.5688	0.0170761
		5.57	0.0173823
		5.5712	0.0176934
		5.5724	0.0180092
		5.5736	0.0183299
		5.5748	0.0186555
		5.576	0.018986
		5.5772	0.0193216
		5.5784	0.0196622
		5.5796	0.020008
		5.5808	0.020359
		5.582	0.0207153
		5.5832	0.0210769
		5.5844	0.0214439
		5.5856	0.0218164
		5.5868	0.0221943
		5.588	0.0225779
		5.5892	0.0229671
		5.5904	0.023362
		5.5916	0.0237626
		5.5928	0.0241691
		5.594	0.0245815
		5.5952	0.0249998
		5.5964	0.0254242
		5.5976	0.0258547
		5.5988	0.0262913
		5.6	0.0267341
		5.6012	0.0271833
		5.6024	0.0276388
		5.6036	0.0281007
		5.6048	0.0285691
		5.606	0.029044
		5.6072	0.0295256
		5.6084	0.0300139
		5.6096	0.030509
		5.6108	0.0310109
		5.612	0.0315196
		5.6132	0.0320354
		5.6144	0.0325582
		5.6156	0.0330881
		5.6168	0.0336252
		5.618	0.0341695
		5.6192	0.0347212
		5.6204	0.0352803
		5.6216	0.0358468
		5.6228	0.0364208
		5.624	0.0370025
		5.6252	0.0375918
		5.6264	0.0381889
		5.6276	0.0387938
		5.6288	0.0394066
		5.63	0.0400273
		5.6312	0.0406561
		5.6324	0.0412931
		5.6336	0.0419381
		5.6348	0.0425915
		5.636	0.0432531
		5.6372	0.0439232
		5.6384	0.0446018
		5.6396	0.0452889
		5.6408	0.0459846
		5.642	0.046689
		5.6432	0.0474021
		5.6444	0.0481241
		5.6456	0.0488551
		5.6468	0.049595
		5.648	0.050344
		5.6492	0.0511021
		5.6504	0.0518694
		5.6516	0.052646
		5.6528	0.053432
		5.654	0.0542273
		5.6552	0.0550322
		5.6564	0.0558467
		5.6576	0.0566708
		5.6588	0.0575046
		5.66	0.0583482
		5.6612	0.0592016
		5.6624	0.0600651
		5.6636	0.0609385
		5.6648	0.061822
		5.666	0.0627156
		5.6672	0.0636195
		5.6684	0.0645337
		5.6696	0.0654583
		5.6708	0.0663933
		5.672	0.0673388
		5.6732	0.0682949
		5.6744	0.0692616
		5.6756	0.0702391
		5.6768	0.0712274
		5.678	0.0722266
		5.6792	0.0732367
		5.6804	0.0742577
		5.6816	0.0752899
		5.6828	0.0763332
		5.684	0.0773878
		5.6852	0.0784536
		5.6864	0.0795308
		5.6876	0.0806194
		5.6888	0.0817194
		5.69	0.0828311
		5.6912	0.0839543
		5.6924	0.0850892
		5.6936	0.0862359
		5.6948	0.0873944
		5.696	0.0885648
		5.6972	0.0897471
		5.6984	0.0909414
		5.6996	0.0921478
		5.7008	0.0933663
		5.702	0.0945971
		5.7032	0.0958401
		5.7044	0.0970954
		5.7056	0.098363
		5.7068	0.0996432
		5.708	0.100936
		5.7092	0.102241
		5.7104	0.103559
		5.7116	0.104889
		5.7128	0.106232
		5.714	0.107588
		5.7152	0.108957
		5.7164	0.110339
		5.7176	0.111734
		5.7188	0.113141
		5.72	0.114562
		5.7212	0.115996
		5.7224	0.117443
		5.7236	0.118903
		5.7248	0.120376
		5.726	0.121863
		5.7272	0.123363
		5.7284	0.124877
		5.7296	0.126404
		5.7308	0.127944
		5.732	0.129498
		5.7332	0.131066
		5.7344	0.132647
		5.7356	0.134242
		5.7368	0.135851
		5.738	0.137473
		5.7392	0.139109
		5.7404	0.140759
		5.7416	0.142423
		5.7428	0.144101
		5.744	0.145793
		5.7452	0.147498
		5.7464	0.149218
		5.7476	0.150952
		5.7488	0.1527
		5.75	0.154462
		5.7512	0.156238
		5.7524	0.158028
		5.7536	0.159832
		5.7548	0.161651
		5.756	0.163484
		5.7572	0.165331
		5.7584	0.167193
		5.7596	0.169068
		5.7608	0.170959
		5.762	0.172863
		5.7632	0.174782
		5.7644	0.176715
		5.7656	0.178663
		5.7668	0.180625
		5.768	0.182602
		5.7692	0.184593
		5.7704	0.186598
		5.7716	0.188618
		5.7728	0.190653
		5.774	0.192702
		5.7752	0.194765
		5.7764	0.196843
		5.7776	0.198936
		5.7788	0.201043
		5.78	0.203165
		5.7812	0.205301
		5.7824	0.207452
		5.7836	0.209617
		5.7848	0.211797
		5.786	0.213991
		5.7872	0.2162
		5.7884	0.218424
		5.7896	0.220662
		5.7908	0.222914
		5.792	0.225181
		5.7932	0.227463
		5.7944	0.229759
		5.7956	0.232069
		5.7968	0.234394
		5.798	0.236734
		5.7992	0.239087
		5.8004	0.241456
		5.8016	0.243838
		5.8028	0.246235
		5.804	0.248647
		5.8052	0.251072
		5.8064	0.253512
		5.8076	0.255967
		5.8088	0.258435
		5.81	0.260918
		5.8112	0.263415
		5.8124	0.265926
		5.8136	0.268452
		5.8148	0.270991
		5.816	0.273545
		5.8172	0.276112
		5.8184	0.278694
		5.8196	0.28129
		5.8208	0.283899
		5.822	0.286523
		5.8232	0.28916
		5.8244	0.291811
		5.8256	0.294476
		5.8268	0.297155
		5.828	0.299847
		5.8292	0.302553
		5.8304	0.305273
		5.8316	0.308006
		5.8328	0.310752
		5.834	0.313513
		5.8352	0.316286
		5.8364	0.319073
		5.8376	0.321873
		5.8388	0.324686
		5.84	0.327513
		5.8412	0.330353
		5.8424	0.333206
		5.8436	0.336071
		5.8448	0.33895
		5.846	0.341842
		5.8472	0.344746
		5.8484	0.347663
		5.8496	0.350593
		5.8508	0.353536
		5.852	0.356491
		5.8532	0.359458
		5.8544	0.362438
		5.8556	0.365431
		5.8568	0.368436
		5.858	0.371452
		5.8592	0.374482
		5.8604	0.377523
		5.8616	0.380576
		5.8628	0.383641
		5.864	0.386718
		5.8652	0.389806
		5.8664	0.392907
		5.8676	0.396019
		5.8688	0.399142
		5.87	0.402277
		5.8712	0.405424
		5.8724	0.408581
		5.8736	0.41175
		5.8748	0.41493
		5.876	0.418121
		5.8772	0.421323
		5.8784	0.424536
		5.8796	0.42776
		5.8808	0.430994
		5.882	0.434239
		5.8832	0.437494
		5.8844	0.44076
		5.8856	0.444037
		5.8868	0.447323
		5.888	0.45062
		5.8892	0.453926
		5.8904	0.457243
		5.8916	0.46057
		5.8928	0.463906
		5.894	0.467252
		5.8952	0.470608
		5.8964	0.473973
		5.8976	0.477348
		5.8988	0.480732
		5.9	0.484125
		5.9012	0.487528
		5.9024	0.490939
		5.9036	0.494359
		5.9048	0.497789
		5.906	0.501226
		5.9072	0.504673
		5.9084	0.508128
		5.9096	0.511592
		5.9108	0.515064
		5.912	0.518544
		5.9132	0.522032
		5.9144	0.525528
		5.9156	0.529033
		5.9168	0.532545
		5.918	0.536065
		5.9192	0.539592
		5.9204	0.543127
		5.9216	0.54667
		5.9228	0.55022
		5.924	0.553777
		5.9252	0.557341
		5.9264	0.560912
		5.9276	0.56449
		5.9288	0.568076
		5.93	0.571667
		5.9312	0.575266
		5.9324	0.578871
		5.9336	0.582482
		5.9348	0.5861
		5.936	0.589724
		5.9372	0.593354
		5.9384	0.59699
		5.9396	0.600632
		5.9408	0.60428
		5.942	0.607933
		5.9432	0.611593
		5.9444	0.615257
		5.9456	0.618927
		5.9468	0.622603
		5.948	0.626284
		5.9492	0.629969
		5.9504	0.63366
		5.9516	0.637356
		5.9528	0.641057
		5.954	0.644762
		5.9552	0.648472
		5.9564	0.652186
		5.9576	0.655905
		5.9588	0.659628
		5.96	0.663356
		5.9612	0.667087
		5.9624	0.670823
		5.9636	0.674562
		5.9648	0.678306
		5.966	0.682053
		5.9672	0.685804
		5.9684	0.689558
		5.9696	0.693316
		5.9708	0.697077
		5.972	0.700842
		5.9732	0.704609
		5.9744	0.70838
		5.9756	0.712154
		5.9768	0.71593
		5.978	0.71971
		5.9792	0.723492
		5.9804	0.727277
		5.9816	0.731064
		5.9828	0.734854
		5.984	0.738647
		5.9852	0.742441
		5.9864	0.746238
		5.9876	0.750037
		5.9888	0.753838
		5.99	0.75764
		5.9912	0.761445
		5.9924	0.765251
		5.9936	0.76906
		5.9948	0.772869
		5.996	0.77668
		5.9972	0.780493
		5.9984	0.784307
		5.9996	0.788122
		6.0008	0.791939
		6.002	0.795756
		6.0032	0.799575
		6.0044	0.803394
		6.0056	0.807215
		6.0068	0.811036
		6.008	0.814858
		6.0092	0.818681
		6.0104	0.822504
		6.0116	0.826327
		6.0128	0.830151
		6.014	0.833976
		6.0152	0.8378
		6.0164	0.841625
		6.0176	0.84545
		6.0188	0.849275
		6.02	0.8531
		6.0212	0.856925
		6.0224	0.860749
		6.0236	0.864574
		6.0248	0.868398
		6.026	0.872221
		6.0272	0.876045
		6.0284	0.879867
		6.0296	0.883689
		6.0308	0.887511
		6.032	0.891332
		6.0332	0.895152
		6.0344	0.898971
		6.0356	0.902789
		6.0368	0.906606
		6.038	0.910422
		6.0392	0.914237
		6.0404	0.918051
		6.0416	0.921864
		6.0428	0.925675
		6.044	0.929485
		6.0452	0.933293
		6.0464	0.9371
		6.0476	0.940906
		6.0488	0.94471
		6.05	0.948512
		6.0512	0.952312
		6.0524	0.956111
		6.0536	0.959907
		6.0548	0.963702
		6.056	0.967495
		6.0572	0.971286
		6.0584	0.975075
		6.0596	0.978861
		6.0608	0.982645
		6.062	0.986427
		6.0632	0.990207
		6.0644	0.993984
		6.0656	0.997759
		6.0668	1.00153
		6.068	1.0053
		6.0692	1.00907
		6.0704	1.01283
		6.0716	1.01659
		6.0728	1.02035
		6.074	1.02411
		6.0752	1.02786
		6.0764	1.03161
		6.0776	1.03536
		6.0788	1.0391
		6.08	1.04284
		6.0812	1.04658
		6.0824	1.05031
		6.0836	1.05404
		6.0848	1.05777
		6.086	1.0615
		6.0872	1.06522
		6.0884	1.06893
		6.0896	1.07265
		6.0908	1.07636
		6.092	1.08006
		6.0932	1.08376
		6.0944	1.08746
		6.0956	1.09115
		6.0968	1.09484
		6.098	1.09853
		6.0992	1.10221
		6.1004	1.10589
		6.1016	1.10956
		6.1028	1.11323
		6.104	1.11689
		6.1052	1.12055
		6.1064	1.12421
		6.1076	1.12786
		6.1088	1.1315
		6.11	1.13515
		6.1112	1.13878
		6.1124	1.14241
		6.1136	1.14604
		6.1148	1.14966
		6.116	1.15328
		6.1172	1.15689
		6.1184	1.16049
		6.1196	1.16409
		6.1208	1.16769
		6.122	1.17127
		6.1232	1.17486
		6.1244	1.17844
		6.1256	1.18201
		6.1268	1.18557
		6.128	1.18913
		6.1292	1.19269
		6.1304	1.19623
		6.1316	1.19978
		6.1328	1.20331
		6.134	1.20684
		6.1352	1.21036
		6.1364	1.21388
		6.1376	1.21739
		6.1388	1.22089
		6.14	1.22438
		6.1412	1.22787
		6.1424	1.23135
		6.1436	1.23483
		6.1448	1.23829
		6.146	1.24175
		6.1472	1.2452
		6.1484	1.24865
		6.1496	1.25208
		6.1508	1.25551
		6.152	1.25893
		6.1532	1.26235
		6.1544	1.26575
		6.1556	1.26915
		6.1568	1.27253
		6.158	1.27591
		6.1592	1.27928
		6.1604	1.28265
		6.1616	1.286
		6.1628	1.28934
		6.164	1.29268
		6.1652	1.296
		6.1664	1.29932
		6.1676	1.30263
		6.1688	1.30592
		6.17	1.30921
		6.1712	1.31249
		6.1724	1.31575
		6.1736	1.31901
		6.1748	1.32226
		6.176	1.32549
		6.1772	1.32872
		6.1784	1.33193
		6.1796	1.33514
		6.1808	1.33833
		6.182	1.34151
		6.1832	1.34468
		6.1844	1.34784
		6.1856	1.35099
		6.1868	1.35412
		6.188	1.35724
		6.1892	1.36035
		6.1904	1.36345
		6.1916	1.36654
		6.1928	1.36961
		6.194	1.37267
		6.1952	1.37572
		6.1964	1.37875
		6.1976	1.38177
		6.1988	1.38478
		6.2	1.38777
		6.2012	1.39075
		6.2024	1.39372
		6.2036	1.39667
		6.2048	1.39961
		6.206	1.40253
		6.2072	1.40543
		6.2084	1.40833
		6.2096	1.4112
		6.2108	1.41406
		6.212	1.41691
		6.2132	1.41974
		6.2144	1.42255
		6.2156	1.42535
		6.2168	1.42813
		6.218	1.4309
		6.2192	1.43365
		6.2204	1.43638
		6.2216	1.43909
		6.2228	1.44179
		6.224	1.44447
		6.2252	1.44713
		6.2264	1.44977
		6.2276	1.4524
		6.2288	1.455
		6.23	1.45759
		6.2312	1.46016
		6.2324	1.46271
		6.2336	1.46524
		6.2348	1.46775
		6.236	1.47024
		6.2372	1.47271
		6.2384	1.47517
		6.2396	1.4776
		6.2408	1.48001
		6.242	1.4824
		6.2432	1.48476
		6.2444	1.48711
		6.2456	1.48944
		6.2468	1.49174
		6.248	1.49402
		6.2492	1.49628
		6.2504	1.49852
		6.2516	1.50073
		6.2528	1.50292
		6.254	1.50509
		6.2552	1.50724
		6.2564	1.50936
		6.2576	1.51146
		6.2588	1.51353
		6.26	1.51558
		6.2612	1.5176
		6.2624	1.5196
		6.2636	1.52158
		6.2648	1.52353
		6.266	1.52545
		6.2672	1.52735
		6.2684	1.52922
		6.2696	1.53107
		6.2708	1.53289
		6.272	1.53468
		6.2732	1.53645
		6.2744	1.53819
		6.2756	1.5399
		6.2768	1.54158
		6.278	1.54324
		6.2792	1.54487
		6.2804	1.54647
		6.2816	1.54804
		6.2828	1.54959
		6.284	1.5511
		6.2852	1.55259
		6.2864	1.55404
		6.2876	1.55547
		6.2888	1.55687
		6.29	1.55823
		6.2912	1.55957
		6.2924	1.56087
		6.2936	1.56215
		6.2948	1.56339
		6.296	1.56461
		6.2972	1.56579
		6.2984	1.56694
		6.2996	1.56806
		6.3008	1.56914
		6.302	1.5702
		6.3032	1.57122
		6.3044	1.57221
		6.3056	1.57316
		6.3068	1.57409
		6.308	1.57497
		6.3092	1.57583
		6.3104	1.57665
		6.3116	1.57744
		6.3128	1.5782
		6.314	1.57892
		6.3152	1.5796
		6.3164	1.58025
		6.3176	1.58087
		6.3188	1.58145
		6.32	1.582
		6.3212	1.58251
		6.3224	1.58299
		6.3236	1.58343
		6.3248	1.58383
		6.326	1.5842
		6.3272	1.58453
		6.3284	1.58483
		6.3296	1.58508
		6.3308	1.58531
		6.332	1.58549
		6.3332	1.58564
		6.3344	1.58575
		6.3356	1.58582
		6.3368	1.58586
		6.338	1.58586
		6.3392	1.58582
		6.3404	1.58574
		6.3416	1.58563
		6.3428	1.58548
		6.344	1.58529
		6.3452	1.58506
		6.3464	1.58479
		6.3476	1.58448
		6.3488	1.58414
		6.35	1.58375
		6.3512	1.58333
		6.3524	1.58287
		6.3536	1.58237
		6.3548	1.58183
		6.356	1.58125
		6.3572	1.58063
		6.3584	1.57997
		6.3596	1.57927
		6.3608	1.57853
		6.362	1.57776
		6.3632	1.57694
		6.3644	1.57608
		6.3656	1.57518
		6.3668	1.57425
		6.368	1.57327
		6.3692	1.57225
		6.3704	1.5712
		6.3716	1.5701
		6.3728	1.56896
		6.374	1.56779
		6.3752	1.56657
		6.3764	1.56531
		6.3776	1.56401
		6.3788	1.56268
		6.38	1.5613
		6.3812	1.55988
		6.3824	1.55842
		6.3836	1.55692
		6.3848	1.55538
		6.386	1.5538
		6.3872	1.55218
		6.3884	1.55052
		6.3896	1.54882
		6.3908	1.54708
		6.392	1.5453
		6.3932	1.54348
		6.3944	1.54162
		6.3956	1.53972
		6.3968	1.53778
		6.398	1.5358
		6.3992	1.53378
		6.4004	1.53172
		6.4016	1.52962
		6.4028	1.52748
		6.404	1.5253
		6.4052	1.52308
		6.4064	1.52082
		6.4076	1.51853
		6.4088	1.51619
		6.41	1.51382
		6.4112	1.5114
		6.4124	1.50895
		6.4136	1.50646
		6.4148	1.50393
		6.416	1.50136
		6.4172	1.49875
		6.4184	1.49611
		6.4196	1.49342
		6.4208	1.4907
		6.422	1.48794
		6.4232	1.48515
		6.4244	1.48231
		6.4256	1.47944
		6.4268	1.47653
		6.428	1.47359
		6.4292	1.4706
		6.4304	1.46759
		6.4316	1.46453
		6.4328	1.46144
		6.434	1.45831
		6.4352	1.45515
		6.4364	1.45195
		6.4376	1.44871
		6.4388	1.44544
		6.44	1.44214
		6.4412	1.43879
		6.4424	1.43542
		6.4436	1.43201
		6.4448	1.42857
		6.446	1.42509
		6.4472	1.42158
		6.4484	1.41803
		6.4496	1.41445
		6.4508	1.41084
		6.452	1.4072
		6.4532	1.40352
		6.4544	1.39981
		6.4556	1.39607
		6.4568	1.3923
		6.458	1.38849
		6.4592	1.38466
		6.4604	1.38079
		6.4616	1.37689
		6.4628	1.37296
		6.464	1.369
		6.4652	1.36502
		6.4664	1.361
		6.4676	1.35695
		6.4688	1.35288
		6.47	1.34877
		6.4712	1.34464
		6.4724	1.34048
		6.4736	1.33629
		6.4748	1.33207
		6.476	1.32783
		6.4772	1.32355
		6.4784	1.31926
		6.4796	1.31493
		6.4808	1.31058
		6.482	1.30621
		6.4832	1.30181
		6.4844	1.29738
		6.4856	1.29293
		6.4868	1.28846
		6.488	1.28396
		6.4892	1.27943
		6.4904	1.27489
		6.4916	1.27032
		6.4928	1.26573
		6.494	1.26111
		6.4952	1.25648
		6.4964	1.25182
		6.4976	1.24714
		6.4988	1.24244
		6.5	1.23772
		6.5012	1.23298
		6.5024	1.22822
		6.5036	1.22344
		6.5048	1.21864
		6.506	1.21383
		6.5072	1.20899
		6.5084	1.20414
		6.5096	1.19926
		6.5108	1.19437
		6.512	1.18947
		6.5132	1.18455
		6.5144	1.17961
		6.5156	1.17465
		6.5168	1.16968
		6.518	1.16469
		6.5192	1.15969
		6.5204	1.15468
		6.5216	1.14965
		6.5228	1.14461
		6.524	1.13955
		6.5252	1.13448
		6.5264	1.1294
		6.5276	1.1243
		6.5288	1.1192
		6.53	1.11408
		6.5312	1.10895
		6.5324	1.10381
		6.5336	1.09866
		6.5348	1.0935
		6.536	1.08833
		6.5372	1.08315
		6.5384	1.07797
		6.5396	1.07277
		6.5408	1.06757
		6.542	1.06235
		6.5432	1.05713
		6.5444	1.05191
		6.5456	1.04667
		6.5468	1.04143
		6.548	1.03619
		6.5492	1.03093
		6.5504	1.02568
		6.5516	1.02042
		6.5528	1.01515
		6.554	1.00988
		6.5552	1.0046
		6.5564	0.999327
		6.5576	0.994046
		6.5588	0.988762
		6.56	0.983476
		6.5612	0.978188
		6.5624	0.972898
		6.5636	0.967606
		6.5648	0.962314
		6.566	0.957021
		6.5672	0.951727
		6.5684	0.946434
		6.5696	0.941141
		6.5708	0.935848
		6.572	0.930557
		6.5732	0.925267
		6.5744	0.919978
		6.5756	0.914692
		6.5768	0.909408
		6.578	0.904126
		6.5792	0.898848
		6.5804	0.893573
		6.5816	0.888301
		6.5828	0.883034
		6.584	0.877771
		6.5852	0.872512
		6.5864	0.867258
		6.5876	0.86201
		6.5888	0.856767
		6.59	0.851529
		6.5912	0.846298
		6.5924	0.841074
		6.5936	0.835856
		6.5948	0.830645
		6.596	0.825441
		6.5972	0.820245
		6.5984	0.815057
		6.5996	0.809877
		6.6008	0.804706
		6.602	0.799543
		6.6032	0.794389
		6.6044	0.789245
		6.6056	0.78411
		6.6068	0.778985
		6.608	0.77387
		6.6092	0.768765
		6.6104	0.763671
		6.6116	0.758588
		6.6128	0.753516
		6.614	0.748456
		6.6152	0.743407
		6.6164	0.73837
		6.6176	0.733345
		6.6188	0.728333
		6.62	0.723333
		6.6212	0.718346
		6.6224	0.713372
		6.6236	0.708411
		6.6248	0.703464
		6.626	0.69853
		6.6272	0.693611
		6.6284	0.688706
		6.6296	0.683815
		6.6308	0.678939
		6.632	0.674077
		6.6332	0.669231
		6.6344	0.6644
		6.6356	0.659584
		6.6368	0.654784
		6.638	0.65
		6.6392	0.645232
		6.6404	0.64048
		6.6416	0.635744
		6.6428	0.631025
		6.644	0.626323
		6.6452	0.621637
		6.6464	0.616969
		6.6476	0.612318
		6.6488	0.607684
		6.65	0.603068
		6.6512	0.59847
		6.6524	0.593889
		6.6536	0.589327
		6.6548	0.584782
		6.656	0.580256
		6.6572	0.575749
		6.6584	0.57126
		6.6596	0.56679
		6.6608	0.562339
		6.662	0.557907
		6.6632	0.553494
		6.6644	0.5491
		6.6656	0.544725
		6.6668	0.540371
		6.668	0.536035
		6.6692	0.53172
		6.6704	0.527424
		6.6716	0.523148
		6.6728	0.518893
		6.674	0.514657
		6.6752	0.510442
		6.6764	0.506247
		6.6776	0.502073
		6.6788	0.497919
		6.68	0.493785
		6.6812	0.489673
		6.6824	0.485581
		6.6836	0.48151
		6.6848	0.47746
		6.686	0.473431
		6.6872	0.469423
		6.6884	0.465436
		6.6896	0.46147
		6.6908	0.457526
		6.692	0.453603
		6.6932	0.449701
		6.6944	0.44582
		6.6956	0.441962
		6.6968	0.438124
		6.698	0.434308
		6.6992	0.430514
		6.7004	0.426742
		6.7016	0.422991
		6.7028	0.419262
		6.704	0.415554
		6.7052	0.411869
		6.7064	0.408205
		6.7076	0.404563
		6.7088	0.400943
		6.71	0.397344
		6.7112	0.393768
		6.7124	0.390213
		6.7136	0.386681
		6.7148	0.38317
		6.716	0.379681
		6.7172	0.376214
		6.7184	0.372769
		6.7196	0.369346
		6.7208	0.365945
		6.722	0.362565
		6.7232	0.359208
		6.7244	0.355873
		6.7256	0.352559
		6.7268	0.349267
		6.728	0.345998
		6.7292	0.34275
		6.7304	0.339523
		6.7316	0.336319
		6.7328	0.333136
		6.734	0.329976
		6.7352	0.326837
		6.7364	0.323719
		6.7376	0.320623
		6.7388	0.317549
		6.74	0.314497
		6.7412	0.311466
		6.7424	0.308457
		6.7436	0.305469
		6.7448	0.302502
		6.746	0.299557
		6.7472	0.296633
		6.7484	0.293731
		6.7496	0.29085
		6.7508	0.28799
		6.752	0.285151
		6.7532	0.282333
		6.7544	0.279537
		6.7556	0.276761
		6.7568	0.274007
		6.758	0.271273
		6.7592	0.26856
		6.7604	0.265868
		6.7616	0.263196
		6.7628	0.260545
		6.764	0.257915
		6.7652	0.255305
		6.7664	0.252716
		6.7676	0.250147
		6.7688	0.247598
		6.77	0.245069
		6.7712	0.242561
		6.7724	0.240073
		6.7736	0.237605
		6.7748	0.235156
		6.776	0.232728
		6.7772	0.230319
		6.7784	0.22793
		6.7796	0.22556
		6.7808	0.22321
		6.782	0.22088
		6.7832	0.218569
		6.7844	0.216277
		6.7856	0.214004
		6.7868	0.211751
		6.788	0.209516
		6.7892	0.2073
		6.7904	0.205104
		6.7916	0.202926
		6.7928	0.200766
		6.794	0.198625
		6.7952	0.196503
		6.7964	0.194399
		6.7976	0.192314
		6.7988	0.190246
		6.8	0.188197
		6.8012	0.186166
		6.8024	0.184152
		6.8036	0.182157
		6.8048	0.180179
		6.806	0.178219
		6.8072	0.176276
		6.8084	0.174351
		6.8096	0.172443
		6.8108	0.170553
		6.812	0.168679
		6.8132	0.166823
		6.8144	0.164983
		6.8156	0.163161
		6.8168	0.161355
		6.818	0.159566
		6.8192	0.157793
		6.8204	0.156037
		6.8216	0.154297
		6.8228	0.152573
		6.824	0.150866
		6.8252	0.149174
		6.8264	0.147499
		6.8276	0.145839
		6.8288	0.144195
		6.83	0.142567
		6.8312	0.140954
		6.8324	0.139357
		6.8336	0.137775
		6.8348	0.136208
		6.836	0.134657
		6.8372	0.13312
		6.8384	0.131598
		6.8396	0.130092
		6.8408	0.128599
		6.842	0.127122
		6.8432	0.125659
		6.8444	0.12421
		6.8456	0.122776
		6.8468	0.121356
		6.848	0.11995
		6.8492	0.118557
		6.8504	0.117179
		6.8516	0.115815
		6.8528	0.114464
		6.854	0.113127
		6.8552	0.111804
		6.8564	0.110493
		6.8576	0.109196
		6.8588	0.107913
		6.86	0.106642
		6.8612	0.105384
		6.8624	0.104139
		6.8636	0.102907
		6.8648	0.101688
		6.866	0.100481
		6.8672	0.0992867
		6.8684	0.0981048
		6.8696	0.0969351
		6.8708	0.0957776
		6.872	0.0946322
		6.8732	0.0934988
		6.8744	0.0923773
		6.8756	0.0912675
		6.8768	0.0901695
		6.878	0.089083
		6.8792	0.0880081
		6.8804	0.0869445
		6.8816	0.0858923
		6.8828	0.0848512
		6.884	0.0838213
		6.8852	0.0828024
		6.8864	0.0817945
		6.8876	0.0807973
		6.8888	0.0798109
		6.89	0.0788352
		6.8912	0.07787
		6.8924	0.0769153
		6.8936	0.075971
		6.8948	0.0750369
		6.896	0.074113
		6.8972	0.0731993
		6.8984	0.0722955
		6.8996	0.0714017
		6.9008	0.0705176
		6.902	0.0696434
		6.9032	0.0687788
		6.9044	0.0679237
		6.9056	0.0670782
		6.9068	0.066242
		6.908	0.0654151
		6.9092	0.0645975
		6.9104	0.063789
		6.9116	0.0629895
		6.9128	0.062199
		6.914	0.0614174
		6.9152	0.0606446
		6.9164	0.0598805
		6.9176	0.0591251
		6.9188	0.0583782
		6.92	0.0576397
		6.9212	0.0569097
		6.9224	0.0561879
		6.9236	0.0554744
		6.9248	0.0547691
		6.926	0.0540718
		6.9272	0.0533825
		6.9284	0.0527012
		6.9296	0.0520276
		6.9308	0.0513619
		6.932	0.0507038
		6.9332	0.0500533
		6.9344	0.0494104
		6.9356	0.0487749
		6.9368	0.0481468
		6.938	0.0475261
		6.9392	0.0469125
		6.9404	0.0463062
		6.9416	0.0457069
		6.9428	0.0451147
		6.944	0.0445294
		6.9452	0.043951
		6.9464	0.0433794
		6.9476	0.0428145
		6.9488	0.0422563
		6.95	0.0417048
		6.9512	0.0411597
		6.9524	0.0406212
		6.9536	0.040089
		6.9548	0.0395632
		6.956	0.0390437
		6.9572	0.0385303
		6.9584	0.0380231
		6.9596	0.037522
		6.9608	0.0370269
		6.962	0.0365377
		6.9632	0.0360545
		6.9644	0.035577
		6.9656	0.0351054
		6.9668	0.0346394
		6.968	0.0341791
		6.9692	0.0337243
		6.9704	0.0332751
		6.9716	0.0328314
		6.9728	0.032393
		6.974	0.03196
		6.9752	0.0315323
		6.9764	0.0311098
		6.9776	0.0306925
		6.9788	0.0302803
		6.98	0.0298732
		6.9812	0.0294711
		6.9824	0.029074
		6.9836	0.0286817
		6.9848	0.0282943
		6.986	0.0279117
		6.9872	0.0275338
		6.9884	0.0271607
		6.9896	0.0267921
		6.9908	0.0264282
		6.992	0.0260687
		6.9932	0.0257137
		6.9944	0.0253632
		6.9956	0.0250171
		6.9968	0.0246753
		6.998	0.0243378
		6.9992	0.0240046
		7.0004	0.0236755
		7.0016	0.0233506
		7.0028	0.0230297
		7.004	0.022713
		7.0052	0.0224002
		7.0064	0.0220914
		7.0076	0.0217865
		7.0088	0.0214855
		7.01	0.0211883
		7.0112	0.0208949
		7.0124	0.0206052
		7.0136	0.0203192
		7.0148	0.0200369
		7.016	0.0197581
		7.0172	0.019483
		7.0184	0.0192114
		7.0196	0.0189432
		7.0208	0.0186786
		7.022	0.0184173
		7.0232	0.0181594
		7.0244	0.0179048
		7.0256	0.0176535
		7.0268	0.0174055
		7.028	0.0171606
		7.0292	0.016919
		7.0304	0.0166805
		7.0316	0.016445
		7.0328	0.0162127
		7.034	0.0159834
		7.0352	0.0157571
		7.0364	0.0155337
		7.0376	0.0153132
		7.0388	0.0150957
		7.04	0.014881
		7.0412	0.0146691
		7.0424	0.01446
		7.0436	0.0142535
		7.0448	0.0140499
		7.046	0.013849
		7.0472	0.0136507
		7.0484	0.013455
		7.0496	0.0132619
		7.0508	0.0130714
		7.052	0.0128834
		7.0532	0.012698
		7.0544	0.0125149
		7.0556	0.0123343
		7.0568	0.0121562
		7.058	0.0119804
		7.0592	0.0118069
		7.0604	0.0116358
		7.0616	0.011467
		7.0628	0.0113004
		7.064	0.0111361
		7.0652	0.010974
		7.0664	0.010814
		7.0676	0.0106563
		7.0688	0.0105006
		7.07	0.0103471
		7.0712	0.0101956
		7.0724	0.0100462
		7.0736	0.00989878
		7.0748	0.00975339
		7.076	0.00960998
		7.0772	0.00946851
		7.0784	0.00932898
		7.0796	0.00919135
		7.0808	0.00905559
		7.082	0.0089217
		7.0832	0.00878964
		7.0844	0.00865938
		7.0856	0.00853092
		7.0868	0.00840421
		7.088	0.00827925
		7.0892	0.00815602
		7.0904	0.00803448
		7.0916	0.00791461
		7.0928	0.00779641
		7.094	0.00767984
		7.0952	0.00756488
		7.0964	0.00745152
		7.0976	0.00733973
		7.0988	0.00722949
		7.1	0.00712079
		7.1012	0.00701361
		7.1024	0.00690791
		7.1036	0.0068037
		7.1048	0.00670094
		7.106	0.00659962
		7.1072	0.00649972
		7.1084	0.00640122
		7.1096	0.0063041
		7.1108	0.00620835
		7.112	0.00611395
		7.1132	0.00602088
		7.1144	0.00592912
		7.1156	0.00583866
		7.1168	0.00574947
		7.118	0.00566155
		7.1192	0.00557488
		7.1204	0.00548944
		7.1216	0.00540521
		7.1228	0.00532218
		7.124	0.00524033
		7.1252	0.00515965
		7.1264	0.00508012
		7.1276	0.00500173
		7.1288	0.00492446
		7.13	0.0048483
		7.1312	0.00477323
		7.1324	0.00469924
		7.1336	0.00462631
		7.1348	0.00455444
		7.136	0.00448359
		7.1372	0.00441378
		7.1384	0.00434496
		7.1396	0.00427715
		7.1408	0.00421032
		7.142	0.00414445
		7.1432	0.00407954
		7.1444	0.00401558
		7.1456	0.00395255
		7.1468	0.00389043
		7.148	0.00382922
		7.1492	0.0037689
		7.1504	0.00370947
		7.1516	0.00365091
		7.1528	0.0035932
		7.154	0.00353634
		7.1552	0.00348032
		7.1564	0.00342512
		7.1576	0.00337073
		7.1588	0.00331714
		7.16	0.00326435
		7.1612	0.00321233
		7.1624	0.00316109
		7.1636	0.0031106
		7.1648	0.00306087
		7.166	0.00301187
		7.1672	0.0029636
		7.1684	0.00291605
		7.1696	0.0028692
		7.1708	0.00282306
		7.172	0.0027776
		7.1732	0.00273283
		7.1744	0.00268873
		7.1756	0.00264528
		7.1768	0.00260249
		7.178	0.00256034
		7.1792	0.00251883
		7.1804	0.00247794
		7.1816	0.00243767
		7.1828	0.00239801
		7.184	0.00235894
		7.1852	0.00232047
		7.1864	0.00228258
		7.1876	0.00224527
		7.1888	0.00220852
		7.19	0.00217233
		7.1912	0.00213669
		7.1924	0.0021016
		7.1936	0.00206698
		7.1948	0.00203295
		7.196	0.00199944
		7.1972	0.00196645
		7.1984	0.00193396
		7.1996	0.00190198
		7.2008	0.00187048
		7.202	0.00183947
		7.2032	0.00180894
		7.2044	0.00177888
		7.2056	0.00174928
		7.2068	0.00172014
		7.208	0.00169145
		7.2092	0.00166321
		7.2104	0.00163541
		7.2116	0.00160804
		7.2128	0.00158109
		7.214	0.00155457
		7.2152	0.00152845
		7.2164	0.00150275
		7.2176	0.00147745
		7.2188	0.00145255
		7.22	0.00142803
		7.2212	0.0014039
		7.2224	0.00138016
		7.2236	0.00135678
		7.2248	0.00133377
		7.226	0.00131113
		7.2272	0.00128884
		7.2284	0.00126691
		7.2296	0.00124533
		7.2308	0.00122408
		7.232	0.00120318
		7.2332	0.0011826
		7.2344	0.00116236
		7.2356	0.00114244
		7.2368	0.00112283
		7.238	0.00110354
		7.2392	0.00108456
		7.2404	0.00106588
		7.2416	0.0010475
		7.2428	0.00102942
		7.244	0.00101162
		7.2452	0.000994118
		7.2464	0.000976894
		7.2476	0.000959948
		7.2488	0.000943277
		7.25	0.000926875
		7.2512	0.000910673
		7.2524	0.000894802
		7.2536	0.000879188
		7.2548	0.000863828
		7.256	0.000848652
		7.2572	0.000833792
		7.2584	0.000819173
		7.2596	0.000804794
		7.2608	0.00079065
		7.262	0.000776738
		7.2632	0.000763054
		7.2644	0.000749595
		7.2656	0.000736357
		7.2668	0.000723338
		7.268	0.000710533
		7.2692	0.00069794
		7.2704	0.000685555
		7.2716	0.000673375
		7.2728	0.000661397
		7.274	0.000649618
		7.2752	0.000638034
		7.2764	0.000626644
		7.2776	0.000615443
		7.2788	0.000604429
		7.28	0.000593533
		7.2812	0.000582887
		7.2824	0.000572418
		7.2836	0.000562126
		7.2848	0.000552006
		7.286	0.000542056
		7.2872	0.000532274
		7.2884	0.000522657
		7.2896	0.000513202
		7.2908	0.000503907
		7.292	0.000494769
		7.2932	0.000485786
		7.2944	0.000476956
		7.2956	0.000468275
		7.2968	0.000459742
		7.298	0.000451354
		7.2992	0.00044311
		7.3004	0.000435006
		7.3016	0.000427041
		7.3028	0.000419212
		7.304	0.000411517
		7.3052	0.000403955
		7.3064	0.000396522
		7.3076	0.000389217
		7.3088	0.000382038
		7.31	0.000374983
		7.3112	0.00036805
		7.3124	0.000361237
		7.3136	0.000354542
		7.3148	0.000347963
		7.316	0.000341498
		7.3172	0.000335146
		7.3184	0.000328904
		7.3196	0.000322771
		7.3208	0.000316745
		7.322	0.000310825
		7.3232	0.000305008
		7.3244	0.000299293
		7.3256	0.000293678
		7.3268	0.000288162
		7.328	0.000282743
		7.3292	0.00027742
		7.3304	0.00027219
		7.3316	0.000267053
		7.3328	0.000262006
		7.334	0.000257049
		7.3352	0.00025218
		7.3364	0.000247331
		7.3376	0.000242636
		7.3388	0.000238025
		7.34	0.000233496
		7.3412	0.000229047
		7.3424	0.000224678
		7.3436	0.000220387
		7.3448	0.000216173
		7.346	0.000212035
		7.3472	0.000207905
		7.3484	0.000203916
		7.3496	0.000199999
		7.3508	0.000196152
		7.352	0.000192375
		7.3532	0.000188666
		7.3544	0.000185024
		7.3556	0.000181448
		7.3568	0.000177937
		7.358	0.000174489
		7.3592	0.000171105
		7.3604	0.000167781
		7.3616	0.000164519
		7.3628	0.000161316
		7.364	0.000158172
		7.3652	0.000155085
		7.3664	0.000152055
		7.3676	0.00014908
		7.3688	0.00014616
		7.37	0.000143294
		7.3712	0.00014048
		7.3724	0.000137719
		7.3736	0.000135008
		7.3748	0.000132348
		7.376	0.000129737
		7.3772	0.000127174
		7.3784	0.000124659
		7.3796	0.000122191
		7.3808	0.000119768
		7.382	0.000117391
		7.3832	0.000115058
		7.3844	0.000112769
		7.3856	0.000110523
		7.3868	0.000108318
		7.388	0.000106156
		7.3892	0.000104033
		7.3904	0.000101951
		7.3916	9.99078e-05
		7.3928	9.79032e-05
		7.394	9.59365e-05
		7.3952	9.4007e-05
		7.3964	9.2114e-05
		7.3976	9.02569e-05
		7.3988	8.84351e-05
[truncated: 1 more rows]

## Sheet: Sheet1
Supplementary Table S5. Zircon Hf and O isotopic data for the 2.45 Gatrondhjemitic gneiss in Qiuhuayu area of Eastern Hebei
Spot	Age (Ma)	176Yb/177Hf	1σ	176Lu/177Hf	1σ	176Hf /177Hf	1σ	εHf(t)	1σ	TDM1 (Ma)	TDM2 (Ma)	δ18O	2SE
22ZH23-1-02	2446	0.0280232	5.48e-05	0.000731831	1.92e-06	0.281348	1.1e-05	3.51991	0.39116	2638.19	2755.04	6.43726	0.189462
22ZH23-1-06	2446	0.0322081	0.000103	0.000833809	3.08e-06	0.281379	1.09e-05	4.44571	0.387604	2603.37	2698.41	6.29028	0.21196
22ZH23-1-07	2446	0.0172361	0.000107	0.000444005	2.69e-06	0.281374	1.16e-05	4.90137	0.412496	2584.52	2670.51	6.52924	0.228467
22ZH23-1-08	2446	0.0292933	0.000193	0.000759401	5.43e-06	0.281361	1.24e-05	3.92927	0.440944	2622.74	2730.01	6.27629	0.185831
22ZH23-1-10	2446	0.0219641	6.89e-05	0.000568636	1.86e-06	0.28137	1.24e-05	4.55916	0.440944	2597.96	2691.46	6.1998	0.227743
22ZH23-1-11	2446	0.0280955	0.000457	0.000739015	1.23e-05	0.281347	1.26e-05	3.47597	0.448056	2639.9	2757.73	6.33527	0.168965
22ZH23-1-12	2446	0.0267949	0.00023	0.000689385	4.76e-06	0.281363	1.07e-05	4.12028	0.380492	2615.14	2718.32	6.10232	0.163995
22ZH23-1-13	2446	0.0270811	0.000173	0.00069499	4.04e-06	0.281368	1.2e-05	4.27454	0.42672	2609.3	2708.89	6.06732	0.180592
22ZH23-1-15	2446	0.0221133	7.78e-05	0.000561966	1.92e-06	0.281355	1.17e-05	4.03684	0.416052	2617.74	2723.43	5.95784	0.163008
22ZH23-1-16	2446	0.0237772	4.62e-05	0.000593614	1.16e-06	0.281355	1.13e-05	3.98781	0.401828	2619.74	2726.43	6.37427	0.223096
22ZH23-1-19	2446	0.0187128	0.000258	0.00047783	5.49e-06	0.281348	1.27e-05	3.92772	0.451612	2621.49	2730.1	6.24329	0.187568
22ZH23-1-21	2446	0.0226252	0.000164	0.000606673	4.32e-06	0.281353	1.21e-05	3.88077	0.430276	2623.86	2732.98	6.29828	0.194415
22ZH23-1-23	2446	0.0235205	0.000221	0.000642579	5.9e-06	0.281338	1.16e-05	3.28771	0.412496	2646.56	2769.24	6.38127	0.149092
22ZH23-1-27	2446	0.0373633	0.000312	0.00100444	9.7e-06	0.281369	1.3e-05	3.8066	0.46228	2628.6	2737.51	6.49125	0.155531
22ZH23-1-29	2446	0.0357681	0.000296	0.000901512	6.98e-06	0.281361	1.23e-05	3.69314	0.437388	2632.44	2744.45	6.49425	0.188662
